# Supplementary material
Source: publisher figshare collection journal article supplement (https://gsajournals.figshare.com/ndownloader/files/17710076)
Supplement: Supplementary file 1 [file 17710076]

## Sheet: gamma-gatk freq>=0.4 igv check
Table S4. SBS and small Indels and their annotation in all mutants.
Mutant ID	Chromosome	Position	Reference base	Variant base	Allelic depths for reference alleles	Allelic depths for variant alleles	Overall depth of coverage	Vairant allele frequency (%)	Zygosity	Effects by functional class gene	Effects by impact	Gene_ID	Gene description
HTM_G347	chr01	7941496	C	T	0	9	9	100	homozygous
HTM_G347	chr01	10556454	T	A	0	17	17	100	homozygous
HTM_G347	chr01	10831311	CGGAACGCG	C	1	5	6	83.3333	homozygous	frameshift_variant	HIGH	OS01G0296166	Hypothetical protein. (Os01t0296166-00)
HTM_G347	chr01	12281507	GA	G	8	7	15	46.6667	heterozygous
HTM_G347	chr01	14552012	C	T	2	7	9	77.7778	homozygous
HTM_G347	chr01	19211190	GA	G	2	9	11	81.8182	homozygous
HTM_G347	chr01	21985079	A	T	0	16	16	100	homozygous
HTM_G347	chr01	29630716	GTAGTTTTTA	G	0	5	5	100	homozygous
HTM_G347	chr01	41678332	C	T	0	16	16	100	homozygous	3_prime_UTR_variant	MODIFIER	OS01G0947700	Conserved hypothetical protein. (Os01t0947700-01)
HTM_G347	chr02	14854266	G	A	0	17	17	100	homozygous
HTM_G347	chr02	21564945	C	CT	4	10	14	71.4286	heterozygous
HTM_G347	chr03	86474	T	TTTTCACAACCCTCCAAAGATTTGACCGTGGAAACACACCCCCACCACCACGCCTCACCTG	2	4	6	66.6667	heterozygous
HTM_G347	chr03	1821295	A	G	0	15	15	100	homozygous
HTM_G347	chr03	8047399	TGATGAATA	T	0	17	17	100	homozygous	3_prime_UTR_variant	MODIFIER	OS03G0252800	Pyridoxal phosphate-dependent transferase%2C major region%2C subdomain 1 domain containing protein. (Os03t0252800-01)
HTM_G347	chr03	17488359	C	CA	5	6	11	54.5455	heterozygous
HTM_G347	chr03	22675488	G	A	0	7	7	100	homozygous	intron_variant	MODIFIER	OS03G0604600	Hypothetical conserved gene. (Os03t0604600-01)
HTM_G347	chr03	24106578	G	A	0	18	18	100	homozygous
HTM_G347	chr03	25456890	G	A	0	10	10	100	homozygous
HTM_G347	chr03	29607441	TA	T	2	14	16	87.5	homozygous
HTM_G347	chr03	30364774	G	A	0	10	10	100	homozygous
HTM_G347	chr03	36357634	T	C	0	12	12	100	homozygous	intron_variant	MODIFIER	OS03G0861100	Conserved hypothetical protein. (Os03t0861100-01)
HTM_G347	chr04	948617	T	A	29	20	49	40.8163	heterozygous
HTM_G347	chr04	9256804	TCAAATGGTCGAAGTG	T	0	6	6	100	homozygous
HTM_G347	chr04	10483863	C	T	0	5	5	100	homozygous
HTM_G347	chr04	11833335	C	T	1	18	19	94.7368	homozygous
HTM_G347	chr04	23935864	C	T	1	12	13	92.3077	homozygous
HTM_G347	chr04	24140183	TTTC	T	0	8	8	100	homozygous
HTM_G347	chr04	24687524	A	G	0	14	14	100	homozygous
HTM_G347	chr04	31856103	T	C	0	21	21	100	homozygous	synonymous_variant	LOW	OS04G0626450	NB-ARC domain containing protein. (Os04t0626450-01)
HTM_G347	chr05	681164	A	C	0	8	8	100	homozygous
HTM_G347	chr05	2543343	GAACAA	G	0	20	20	100	homozygous
HTM_G347	chr05	2558397	CTTTTT	C	0	13	13	100	homozygous	intron_variant	MODIFIER	OS05G0144300	DEAD-like helicase%2C N-terminal domain containing protein. (Os05t0144300-01)
HTM_G347	chr05	7345510	T	TG	0	14	14	100	homozygous
HTM_G347	chr05	15948600	G	C	6	5	11	45.4545	heterozygous
HTM_G347	chr05	16188068	TAA	T	0	16	16	100	homozygous
HTM_G347	chr05	19475541	G	GT	3	5	8	62.5	heterozygous
HTM_G347	chr05	19811971	T	A	6	5	11	45.4545	heterozygous
HTM_G347	chr05	24636302	A	C	0	11	11	100	homozygous
HTM_G347	chr05	26535061	G	A	0	9	9	100	homozygous
HTM_G347	chr06	2807512	A	T	0	8	8	100	homozygous	intron_variant	MODIFIER	OS06G0154500	Similar to MAP kinase 5. (Os06t0154500-01)
HTM_G347	chr06	6450315	CG	C	0	9	9	100	homozygous
HTM_G347	chr06	6450317	C	A	0	9	9	100	homozygous
HTM_G347	chr06	7456046	A	G	0	10	10	100	homozygous
HTM_G347	chr06	20867448	C	T	16	12	28	42.8571	heterozygous
HTM_G347	chr06	23708760	G	A	3	8	11	72.7273	heterozygous
HTM_G347	chr06	24360904	AC	A	1	17	18	94.4444	homozygous	frameshift_variant	HIGH	OS06G0611000	Similar to 65kD microtubule associated protein. (Os06t0611000-01)%3BSimilar to Microtubule-associated protein MAP65-1a. (Os06t0611000-02)
HTM_G347	chr06	26679965	C	T	0	9	9	100	homozygous
HTM_G347	chr07	4241506	A	AT	0	15	15	100	homozygous	intron_variant	MODIFIER	OS07G0180700	Similar to Major facilitator superfamily antiporter. (Os07t0180700-01)
HTM_G347	chr07	5255768	T	G	3	9	12	75	homozygous
HTM_G347	chr07	5649690	GTTCTTGACATTTGATATCA	G	0	15	15	100	homozygous	intron_variant	MODIFIER	OS07G0204900	Similar to Zeta-carotene desaturase (Fragment). (Os07t0204900-01)%3BSimilar to Zeta-carotene desaturase. (Os07t0204900-02)%3BSimilar to Zeta-carotene desaturase. (Os07t0204900-03)
HTM_G347	chr07	9608683	T	G	0	6	6	100	homozygous
HTM_G347	chr07	17391443	C	A	3	9	12	75	homozygous
HTM_G347	chr07	22592397	ATTTTCAGCGACCTAT	A	0	12	12	100	homozygous	intron_variant	MODIFIER	OS07G0564000	Conserved hypothetical protein. (Os07t0564000-01)
HTM_G347	chr07	23525766	C	T	0	6	6	100	homozygous
HTM_G347	chr07	24796554	G	A	0	13	13	100	homozygous
HTM_G347	chr08	191142	A	G	0	18	18	100	homozygous	3_prime_UTR_variant	MODIFIER	OS08G0103300	Similar to Tubby-like protein 3. (Os08t0103300-01)%3BSimilar to Tubby-like F-box protein 12. (Os08t0103300-02)
HTM_G347	chr08	6265405	A	C	0	15	15	100	homozygous
HTM_G347	chr08	6588886	C	T	4	8	12	66.6667	heterozygous
HTM_G347	chr08	8656162	G	A	0	8	8	100	homozygous
HTM_G347	chr08	8718751	CGCCG	C	0	9	9	100	homozygous
HTM_G347	chr08	10029668	G	A	0	9	9	100	homozygous
HTM_G347	chr08	12868917	T	A	0	12	12	100	homozygous	missense_variant	MODERATE	OS08G0307400	Similar to Phosphatidylinositol 3-kinase 1. (Os08t0307400-01)%3BSimilar to Phosphatidylinositol 3-kinase%2C root isoform (EC 2.7.1.137) (PI3- kinase) (PtdIns-3-kinase) (PI3K) (SPI3K-5). (Os08t0307400-02)%3BSimilar to Phosphatidylinositol 3-kinase 1. (Os08t0307400-03)
HTM_G347	chr08	21666742	T	A	1	18	19	94.7368	homozygous
HTM_G347	chr08	23486802	A	C	0	14	14	100	homozygous
HTM_G347	chr09	4033466	CAT	C	8	9	17	52.9412	heterozygous	intron_variant	MODIFIER	OS09G0252800	HECT domain containing protein. (Os09t0252800-01)%3BSimilar to predicted protein. (Os09t0252800-02)
HTM_G347	chr09	4863914	T	C	0	7	7	100	homozygous
HTM_G347	chr09	6721099	T	G	1	13	14	92.8571	homozygous
HTM_G347	chr09	8555550	G	A	0	10	10	100	homozygous
HTM_G347	chr09	8841468	T	A	12	9	21	42.8571	heterozygous
HTM_G347	chr09	17780140	TTTCATGTTA	T	1	18	19	94.7368	homozygous	intron_variant	MODIFIER	OS09G0468000	Multi antimicrobial extrusion protein MatE family protein. (Os09t0468000-01)
HTM_G347	chr10	6899583	G	A	0	10	10	100	homozygous	intron_variant	MODIFIER	OS10G0198900	Drug/metabolite transporter domain containing protein. (Os10t0198900-00)
HTM_G347	chr10	9841701	A	G	1	16	17	94.1176	homozygous
HTM_G347	chr10	10611984	C	T	3	8	11	72.7273	heterozygous
HTM_G347	chr10	12220116	T	A	0	15	15	100	homozygous
HTM_G347	chr10	12220117	T	A	0	15	15	100	homozygous
HTM_G347	chr10	22700406	C	CA	0	14	14	100	homozygous
HTM_G347	chr11	9189640	ATT	A	0	24	24	100	homozygous	intron_variant	MODIFIER	OS11G0267300	Similar to Endonuclease III homologue. (Os11t0267300-01)
HTM_G347	chr11	9402321	T	C	1	11	12	91.6667	homozygous
HTM_G347	chr11	13154808	G	A	2	18	20	90	homozygous
HTM_G347	chr11	21642651	A	G	0	20	20	100	homozygous
HTM_G347	chr12	12165605	A	G	0	7	7	100	homozygous
HTM_G347	chr12	14772110	T	C	0	19	19	100	homozygous
HTM_G347	chr12	18367244	T	A	0	8	8	100	homozygous
HTM_G347	chr12	22933261	G	C	0	10	10	100	homozygous
HTM_G347	chr12	25605011	A	G	4	6	10	60	heterozygous
HTM_G347	chr12	26360415	A	C	0	14	14	100	homozygous
HTM_G348	chr01	1376399	T	C	1	17	18	94.4444	homozygous
HTM_G348	chr01	5175302	A	T	1	10	11	90.9091	homozygous
HTM_G348	chr01	10904209	TGTACCGGTAC	T	0	8	8	100	homozygous
HTM_G348	chr01	16274256	T	A	0	16	16	100	homozygous
HTM_G348	chr01	16274257	C	T	0	16	16	100	homozygous
HTM_G348	chr01	43263774	AG	A	2	6	8	75	homozygous
HTM_G348	chr02	11600718	C	CCTAT	5	16	21	76.1905	homozygous
HTM_G348	chr02	13429508	C	T	1	20	21	95.2381	homozygous
HTM_G348	chr02	16257955	G	A	0	12	12	100	homozygous
HTM_G348	chr02	22689592	C	T	1	14	15	93.3333	homozygous	missense_variant	MODERATE	OS02G0588500	Hypothetical conserved gene. (Os02t0588500-01)%3BPLC-like phosphodiesterase%2C TIM beta/alpha-barrel domain domain containing protein. (Os02t0588500-02)
HTM_G348	chr02	25750450	T	G	0	18	18	100	homozygous
HTM_G348	chr03	3645373	A	C	0	11	11	100	homozygous
HTM_G348	chr03	12436624	AGGT	A	0	12	12	100	homozygous
HTM_G348	chr03	19403439	A	C	0	25	25	100	homozygous
HTM_G348	chr04	2099223	T	A	0	13	13	100	homozygous
HTM_G348	chr04	2935267	C	T	4	8	12	66.6667	heterozygous
HTM_G348	chr04	3481935	C	T	6	8	14	57.1429	heterozygous
HTM_G348	chr04	16516306	A	G	0	15	15	100	homozygous
HTM_G348	chr04	18655625	AAGAGAGATCAGGGGGT	A	1	17	18	94.4444	homozygous
HTM_G348	chr04	19997993	A	C	0	11	11	100	homozygous
HTM_G348	chr04	21197331	CA	C	0	27	27	100	homozygous	non_coding_exon_variant	MODIFIER	EPlOSAG00000038178
HTM_G348	chr04	21768415	G	A	0	15	15	100	homozygous
HTM_G348	chr04	29905645	A	AG	0	8	8	100	homozygous
HTM_G348	chr04	30512874	CGTCT	C	0	11	11	100	homozygous	frameshift_variant	HIGH	OS04G0604600	Similar to OSIGBa0118P15.10 protein. (Os04t0604600-01)
HTM_G348	chr04	31248769	T	C	0	17	17	100	homozygous	missense_variant	MODERATE	OS04G0615800	Similar to H0525G02.5 protein. (Os04t0615800-01)
HTM_G348	chr04	31929211	C	CT	0	19	19	100	homozygous
HTM_G348	chr04	32340245	T	G	1	18	19	94.7368	homozygous
HTM_G348	chr04	32457179	GA	G	0	12	12	100	homozygous	frameshift_variant	HIGH	OS04G0638600	Hypothetical conserved gene. (Os04t0638600-00)
HTM_G348	chr05	14007309	TG	T	0	16	16	100	homozygous
HTM_G348	chr05	24972209	G	GA	0	22	22	100	homozygous
HTM_G348	chr05	26055477	T	C	0	12	12	100	homozygous	missense_variant	MODERATE	OS05G0523300	Similar to IAA8 (Fragment). (Os05t0523300-01)
HTM_G348	chr05	26464120	G	T	3	11	14	78.5714	homozygous
HTM_G348	chr06	7109511	CAATA	C	0	18	18	100	homozygous
HTM_G348	chr06	11615138	C	G	0	13	13	100	homozygous
HTM_G348	chr06	18242576	T	C	0	24	24	100	homozygous
HTM_G348	chr06	19484519	G	A	10	8	18	44.4444	heterozygous
HTM_G348	chr06	26514334	G	T	6	11	17	64.7059	heterozygous
HTM_G348	chr07	2898279	G	A	6	12	18	66.6667	heterozygous
HTM_G348	chr07	4473838	C	A	2	11	13	84.6154	homozygous
HTM_G348	chr07	6180489	G	A	1	14	15	93.3333	homozygous
HTM_G348	chr07	6246587	A	G	0	22	22	100	homozygous
HTM_G348	chr07	11189434	G	A	0	11	11	100	homozygous
HTM_G348	chr07	18634731	TC	T	0	13	13	100	homozygous
HTM_G348	chr08	450897	G	A	7	9	16	56.25	heterozygous
HTM_G348	chr08	729898	TAA	T	0	21	21	100	homozygous
HTM_G348	chr08	2162917	A	G	1	17	18	94.4444	homozygous	5_prime_UTR_variant	MODIFIER	OS08G0138700	Serine/threonine protein kinase-related domain containing protein. (Os08t0138700-01)
HTM_G348	chr08	3242294	TAGCACACAGGG	T	0	14	14	100	homozygous
HTM_G348	chr08	4945307	C	T	0	18	18	100	homozygous
HTM_G348	chr08	12224917	G	A	0	16	16	100	homozygous
HTM_G348	chr08	14351977	GA	G	1	12	13	92.3077	homozygous	intron_variant	MODIFIER	OS08G0326500	Similar to glycosyl hydrolase family 17 protein. (Os08t0326500-01)
HTM_G348	chr08	14351980	A	AT	1	12	13	92.3077	homozygous	intron_variant	MODIFIER	OS08G0326500	Similar to glycosyl hydrolase family 17 protein. (Os08t0326500-01)
HTM_G348	chr08	17209350	C	G	0	10	10	100	homozygous
HTM_G348	chr08	18621799	A	G	0	15	15	100	homozygous
HTM_G348	chr08	21313873	A	C	0	30	30	100	homozygous
HTM_G348	chr08	24623317	A	T	0	12	12	100	homozygous
HTM_G348	chr08	25460222	C	T	0	19	19	100	homozygous
HTM_G348	chr08	27983053	G	A	0	13	13	100	homozygous
HTM_G348	chr09	733405	G	A	0	8	8	100	homozygous
HTM_G348	chr09	2961134	A	C	0	12	12	100	homozygous
HTM_G348	chr09	4148874	GGA	G	3	5	8	62.5	heterozygous
HTM_G348	chr09	7363155	G	C	0	19	19	100	homozygous
HTM_G348	chr09	9009796	T	C	6	11	17	64.7059	heterozygous
HTM_G348	chr09	10225349	C	T	0	13	13	100	homozygous
HTM_G348	chr09	16094313	T	TG	0	19	19	100	homozygous	intron_variant	MODIFIER	OS09G0436800	CAAX amino terminal protease domain containing protein. (Os09t0436800-01)
HTM_G348	chr10	2845568	T	G	0	12	12	100	homozygous
HTM_G348	chr10	6488426	G	A	0	18	18	100	homozygous
HTM_G348	chr10	9002613	C	A	0	29	29	100	homozygous	synonymous_variant	LOW	OS10G0325400	Remorin%2C C-terminal domain containing protein. (Os10t0325400-01)
HTM_G348	chr10	10751839	GC	G	0	8	8	100	homozygous
HTM_G348	chr10	11116272	A	T	1	26	27	96.2963	homozygous
HTM_G348	chr10	14931690	G	A	0	5	5	100	homozygous
HTM_G348	chr11	251616	C	G	0	13	13	100	homozygous	3_prime_UTR_variant	MODIFIER	OS11G0105350	Hypothetical protein. (Os11t0105350-00)
HTM_G348	chr11	2629097	G	A	0	20	20	100	homozygous
HTM_G348	chr11	6050273	C	T	0	9	9	100	homozygous
HTM_G348	chr11	11637335	C	A	1	12	13	92.3077	homozygous
HTM_G348	chr11	19462748	GTACAACGCAGAC	G	0	11	11	100	homozygous
HTM_G348	chr11	19462762	TTGACAACATAC	T	0	11	11	100	homozygous
HTM_G348	chr12	2083869	G	A	0	21	21	100	homozygous
HTM_G348	chr12	2466791	C	CA	0	11	11	100	homozygous
HTM_G348	chr12	13274256	G	C	0	19	19	100	homozygous
HTM_G348	chr12	17394529	TGCAA	T	0	7	7	100	homozygous
HTM_G348	chr12	27364004	G	A	9	10	19	52.6316	heterozygous
HTM_G349	chr01	5474906	C	T	0	18	18	100	homozygous
HTM_G349	chr01	13247911	C	T	0	23	23	100	homozygous	synonymous_variant	LOW	OS01G0337600	Similar to predicted protein. (Os01t0337600-01)%3BSimilar to binding. (Os01t0337600-02)
HTM_G349	chr01	16017140	C	G	0	17	17	100	homozygous
HTM_G349	chr01	16149975	T	A	0	20	20	100	homozygous
HTM_G349	chr01	25320228	A	T	0	16	16	100	homozygous
HTM_G349	chr01	26469390	A	G	2	18	20	90	homozygous
HTM_G349	chr01	37960437	AAGTAT	A	0	14	14	100	homozygous
HTM_G349	chr01	41607525	G	A	0	7	7	100	homozygous	intron_variant	MODIFIER	OS01G0946850	Conserved hypothetical protein. (Os01t0946850-00)
HTM_G349	chr02	5386573	G	A	0	10	10	100	homozygous
HTM_G349	chr02	5434992	G	A	0	17	17	100	homozygous
HTM_G349	chr02	24534109	TTC	T	1	10	11	90.9091	homozygous
HTM_G349	chr02	33526348	G	T	0	5	5	100	homozygous
HTM_G349	chr03	3537001	CT	C	0	21	21	100	homozygous
HTM_G349	chr03	8579269	A	C	1	14	15	93.3333	homozygous
HTM_G349	chr03	9698563	TC	T	1	17	18	94.4444	homozygous
HTM_G349	chr03	18310277	T	C	1	5	6	83.3333	homozygous
HTM_G349	chr03	24650281	C	G	0	21	21	100	homozygous
HTM_G349	chr03	25146685	C	G	0	18	18	100	homozygous
HTM_G349	chr03	26034415	G	GA	0	14	14	100	homozygous
HTM_G349	chr03	31320347	A	G	2	20	22	90.9091	homozygous
HTM_G349	chr03	31339743	G	A	0	19	19	100	homozygous
HTM_G349	chr04	2925640	T	G	4	4	8	50	heterozygous
HTM_G349	chr04	8631607	TG	T	0	4	4	100	homozygous
HTM_G349	chr04	11999742	G	A	0	5	5	100	homozygous
HTM_G349	chr04	14716132	T	A	1	15	16	93.75	homozygous	intron_variant	MODIFIER	OS04G0320100	Coenzyme F420 hydrogenase/dehydrogenase beta subunit%2C N-terminal domain containing protein. (Os04t0320100-01)
HTM_G349	chr04	24573889	T	A	8	9	17	52.9412	heterozygous
HTM_G349	chr04	27571305	AT	A	0	22	22	100	homozygous	frameshift_variant	HIGH	OS04G0550700	Uncharacterised conserved protein UCP012943 domain containing protein. (Os04t0550700-01)
HTM_G349	chr04	27571307	CTACTTGCAATAGG	C	0	22	22	100	homozygous	frameshift_variant	HIGH	OS04G0550700	Uncharacterised conserved protein UCP012943 domain containing protein. (Os04t0550700-01)
HTM_G349	chr05	1383763	TG	T	0	7	7	100	homozygous
HTM_G349	chr05	7407844	GATATAATAT	G	1	12	13	92.3077	homozygous	intron_variant	MODIFIER	OS05G0220300	Similar to pollen allergen Phl p 11. (Os05t0220300-00)
HTM_G349	chr05	7961867	CCCCGTTGTTTAGA	C	0	21	21	100	homozygous
HTM_G349	chr05	14040703	T	A	6	8	14	57.1429	heterozygous
HTM_G349	chr05	21892049	G	A	0	22	22	100	homozygous
HTM_G349	chr06	1656975	A	C	0	21	21	100	homozygous
HTM_G349	chr06	2848094	T	C	10	11	21	52.381	heterozygous
HTM_G349	chr06	8004377	C	A	1	17	18	94.4444	homozygous
HTM_G349	chr06	8844307	CATTA	C	0	9	9	100	homozygous
HTM_G349	chr06	12049538	A	T	1	17	18	94.4444	homozygous
HTM_G349	chr06	23698804	G	A	1	18	19	94.7368	homozygous
HTM_G349	chr06	24559222	GT	G	0	20	20	100	homozygous
HTM_G349	chr06	30596844	GC	G	1	21	22	95.4545	homozygous	splice_region_variant	LOW	OS06G0720000	Conserved hypothetical protein. (Os06t0720000-01)%3BConserved hypothetical protein. (Os06t0720000-02)%3BSimilar to H0124E07.1 protein. (Os06t0720000-03)
HTM_G349	chr06	31211631	A	G	0	17	17	100	homozygous
HTM_G349	chr07	523362	TGGCATAAAGTGTCTGACATTAAAATATTCA	T	1	10	11	90.9091	homozygous
HTM_G349	chr07	13367422	T	TA	2	16	18	88.8889	homozygous	3_prime_UTR_variant	MODIFIER	OS07G0418700	Proline-rich glycoprotein%2C ABA-dependent inhibition of root growth (Os07t0418700-01)
HTM_G349	chr07	13367424	C	A	0	19	19	100	homozygous	3_prime_UTR_variant	MODIFIER	OS07G0418700	Proline-rich glycoprotein%2C ABA-dependent inhibition of root growth (Os07t0418700-01)
HTM_G349	chr07	15113628	G	A	0	14	14	100	homozygous
HTM_G349	chr07	19004194	TATAG	T	0	18	18	100	homozygous
HTM_G349	chr07	22114007	T	G	0	27	27	100	homozygous
HTM_G349	chr07	22951420	ACC	A	0	13	13	100	homozygous	frameshift_variant&splice_donor_variant&splice_region_variant&intron_variant	HIGH	OS07G0570100	Similar to predicted protein. (Os07t0570100-01)
HTM_G349	chr07	22951423	TGACTCA	T	0	13	13	100	homozygous	disruptive_inframe_deletion&splice_region_variant	MODERATE	OS07G0570100	Similar to predicted protein. (Os07t0570100-01)
HTM_G349	chr07	27535149	A	G	0	12	12	100	homozygous
HTM_G349	chr07	28375500	CA	C	0	23	23	100	homozygous
HTM_G349	chr08	321917	G	A	2	17	19	89.4737	homozygous	3_prime_UTR_variant	MODIFIER	OS08G0106501	Protein of unknown function DUF679 family protein. (Os08t0106501-01)
HTM_G349	chr08	1482235	C	G	0	27	27	100	homozygous	intron_variant	MODIFIER	OS08G0125450	Hypothetical protein. (Os08t0125450-00)
HTM_G349	chr08	5791956	ATGAATTGT	A	0	13	13	100	homozygous
HTM_G349	chr08	7250274	C	T	0	17	17	100	homozygous
HTM_G349	chr08	19633548	GAA	G	1	9	10	90	homozygous	intron_variant	MODIFIER	OS08G0409900	Major facilitator superfamily protein. (Os08t0409900-01)
HTM_G349	chr08	24660333	G	A	0	14	14	100	homozygous
HTM_G349	chr08	27080297	G	A	0	7	7	100	homozygous
HTM_G349	chr09	457915	TC	T	0	18	18	100	homozygous
HTM_G349	chr09	838123	G	A	0	13	13	100	homozygous
HTM_G349	chr09	3052943	T	G	2	14	16	87.5	homozygous	intron_variant	MODIFIER	OS09G0240200	Zinc finger%2C B-box domain containing protein. (Os09t0240200-01)
HTM_G349	chr09	4094275	CA	C	0	8	8	100	homozygous
HTM_G349	chr09	5347366	G	C	0	21	21	100	homozygous
HTM_G349	chr09	9458712	C	T	1	25	26	96.1538	homozygous
HTM_G349	chr09	14448462	G	A	1	23	24	95.8333	homozygous
HTM_G349	chr09	14571051	G	A	0	21	21	100	homozygous
HTM_G349	chr09	14895085	A	C	0	16	16	100	homozygous
HTM_G349	chr09	16553342	T	C	0	6	6	100	homozygous
HTM_G349	chr10	6621853	C	T	12	12	24	50	heterozygous
HTM_G349	chr10	11678302	T	G	0	9	9	100	homozygous
HTM_G349	chr10	22425261	C	CGGTTTTGTAAGTT	0	7	7	100	homozygous
HTM_G349	chr10	22671564	ATT	A	0	10	10	100	homozygous	3_prime_UTR_variant	MODIFIER	OS10G0571600	No apical meristem (NAM) protein domain containing protein. (Os10t0571600-01)
HTM_G349	chr11	3460187	C	CT	1	13	14	92.8571	homozygous
HTM_G349	chr11	13895134	C	T	1	7	8	87.5	homozygous	missense_variant	MODERATE	OS11G0431700	Similar to Serine carboxypeptidase. (Os11t0431700-01)
HTM_G349	chr11	14534139	CT	C	1	10	11	90.9091	homozygous
HTM_G349	chr11	16232856	C	T	0	16	16	100	homozygous
HTM_G349	chr11	19996991	T	TG	0	7	7	100	homozygous
HTM_G349	chr11	22117817	T	C	0	9	9	100	homozygous
HTM_G349	chr11	26024880	A	T	0	6	6	100	homozygous
HTM_G349	chr12	1308246	AT	A	0	21	21	100	homozygous
HTM_G349	chr12	10231707	T	C	0	17	17	100	homozygous
HTM_G349	chr12	12896421	G	A	0	15	15	100	homozygous
HTM_G349	chr12	13151677	T	G	7	9	16	56.25	heterozygous
HTM_G349	chr12	13543504	G	A	0	14	14	100	homozygous
HTM_G349	chr12	17804106	GATA	G	0	22	22	100	homozygous
HTM_G349	chr12	20245527	T	G	0	12	12	100	homozygous
HTM_G349	chr12	26287011	G	C	0	14	14	100	homozygous
HTM_G349	chr12	26597036	TTTTA	T	0	14	14	100	homozygous
HTM_G351	chr01	6588276	C	CTT	2	13	15	86.6667	homozygous
HTM_G351	chr01	10065623	C	T	0	6	6	100	homozygous
HTM_G351	chr01	13734006	C	T	0	24	24	100	homozygous
HTM_G351	chr01	21576102	G	A	1	16	17	94.1176	homozygous
HTM_G351	chr01	27854717	G	T	1	16	17	94.1176	homozygous	3_prime_UTR_variant	MODIFIER	OS01G0677400	Conserved hypothetical protein. (Os01t0677400-01)
HTM_G351	chr02	6692377	T	C	0	14	14	100	homozygous
HTM_G351	chr02	14797050	C	A	0	8	8	100	homozygous
HTM_G351	chr02	18933397	C	T	1	17	18	94.4444	homozygous
HTM_G351	chr02	19455807	C	G	1	19	20	95	homozygous	missense_variant	MODERATE	OS02G0529700	Similar to Acidic ribosomal protein P2a-4 (Fragment). (Os02t0529700-01)
HTM_G351	chr02	20394679	G	C	2	8	10	80	homozygous
HTM_G351	chr02	24947696	C	T	0	6	6	100	homozygous
HTM_G351	chr02	28594058	A	T	2	5	7	71.4286	heterozygous
HTM_G351	chr02	29680941	G	A	1	19	20	95	homozygous
HTM_G351	chr02	30458307	C	A	0	19	19	100	homozygous	intron_variant	MODIFIER	OS02G0731200	Transcription factor MADS57. (Os02t0731200-01)
HTM_G351	chr03	4051813	C	T	1	7	8	87.5	homozygous
HTM_G351	chr03	5811755	TCAA	T	1	21	22	95.4545	homozygous	disruptive_inframe_deletion	MODERATE	OS03G0211400	Calmodulin-binding%2C plant family protein. (Os03t0211400-01)
HTM_G351	chr03	8620225	G	A	3	4	7	57.1429	heterozygous
HTM_G351	chr03	16854508	C	T	12	9	21	42.8571	heterozygous
HTM_G351	chr03	20688371	G	C	1	20	21	95.2381	homozygous
HTM_G351	chr03	23788432	G	A	14	13	27	48.1481	heterozygous
HTM_G351	chr03	24322100	A	G	0	17	17	100	homozygous
HTM_G351	chr03	34742196	AATATATATAT	A	0	8	8	100	homozygous
HTM_G351	chr03	35737068	A	T	0	18	18	100	homozygous	missense_variant	MODERATE	OS03G0849600	COG complex component%2C COG2 family protein. (Os03t0849600-01)
HTM_G351	chr03	35987482	C	T	0	14	14	100	homozygous
HTM_G351	chr04	337660	T	C	0	14	14	100	homozygous
HTM_G351	chr04	8125689	GA	G	0	10	10	100	homozygous	frameshift_variant	HIGH	OS04G0221600	Zinc finger%2C PHD-type domain containing protein. (Os04t0221600-01)
HTM_G351	chr04	17244516	G	T	0	9	9	100	homozygous
HTM_G351	chr04	26732594	C	T	0	12	12	100	homozygous
HTM_G351	chr04	29932813	A	T	1	8	9	88.8889	homozygous
HTM_G351	chr04	32751143	A	C	0	12	12	100	homozygous
HTM_G351	chr04	32850487	T	C	0	18	18	100	homozygous
HTM_G351	chr05	4392526	G	A	1	11	12	91.6667	homozygous
HTM_G351	chr05	11125168	G	A	1	17	18	94.4444	homozygous
HTM_G351	chr05	14581193	A	C	0	16	16	100	homozygous
HTM_G351	chr05	15208822	C	A	1	18	19	94.7368	homozygous
HTM_G351	chr06	6591353	C	T	0	13	13	100	homozygous	synonymous_variant	LOW	OS06G0226950	Fatty acid hydroxylase domain containing protein. (Os06t0226950-01)
HTM_G351	chr06	8432633	C	A	3	22	25	88	homozygous
HTM_G351	chr06	16252018	G	T	0	6	6	100	homozygous
HTM_G351	chr06	24969765	C	T	2	12	14	85.7143	homozygous
HTM_G351	chr07	1439532	G	T	0	18	18	100	homozygous
HTM_G351	chr07	26650350	C	CT	0	15	15	100	homozygous
HTM_G351	chr07	26650355	G	C	0	15	15	100	homozygous
HTM_G351	chr07	28976084	T	C	0	20	20	100	homozygous
HTM_G351	chr08	2337980	G	A	0	14	14	100	homozygous
HTM_G351	chr08	8564567	T	G	0	11	11	100	homozygous
HTM_G351	chr08	15723807	TCC	T	0	8	8	100	homozygous
HTM_G351	chr08	15723811	GGCT	G	0	8	8	100	homozygous
HTM_G351	chr08	15723815	C	A	0	8	8	100	homozygous
HTM_G351	chr08	15723821	GC	G	0	10	10	100	homozygous
HTM_G351	chr08	15723823	TGTGG	T	0	10	10	100	homozygous
HTM_G351	chr08	15723831	TGG	T	0	10	10	100	homozygous
HTM_G351	chr08	15723836	C	A	0	10	10	100	homozygous
HTM_G351	chr08	15723837	T	A	0	10	10	100	homozygous
HTM_G351	chr08	15723838	ACGTGGC	A	0	10	10	100	homozygous
HTM_G351	chr08	15723846	GCC	G	0	11	11	100	homozygous
HTM_G351	chr08	15723848	C	CAAA	0	11	11	100	homozygous
HTM_G351	chr08	20244619	G	A	0	18	18	100	homozygous
HTM_G351	chr09	1822673	C	T	0	10	10	100	homozygous
HTM_G351	chr09	8118579	T	C	1	12	13	92.3077	homozygous
HTM_G351	chr09	12304398	G	A	1	8	9	88.8889	homozygous
HTM_G351	chr09	16343389	T	C	0	11	11	100	homozygous
HTM_G351	chr09	19626505	T	C	0	13	13	100	homozygous	missense_variant	MODERATE	OS09G0506800	Similar to Meiotic asynaptic mutant 1. (Os09t0506800-01)%3BSimilar to Essential protein for meiotic synapsis. (Os09t0506800-02)
HTM_G351	chr10	132940	G	A	2	16	18	88.8889	homozygous
HTM_G351	chr10	3430862	C	T	0	13	13	100	homozygous	intron_variant	MODIFIER	OS10G0154600	Conserved hypothetical protein. (Os10t0154600-01)
HTM_G351	chr10	10133363	G	A	1	8	9	88.8889	homozygous
HTM_G351	chr11	10911686	C	T	0	11	11	100	homozygous	intron_variant	MODIFIER	OS11G0296800	Chromatin SPT2 family protein. (Os11t0296800-01)
HTM_G351	chr11	15287324	C	T	0	8	8	100	homozygous
HTM_G351	chr11	15355110	A	G	2	17	19	89.4737	homozygous
HTM_G351	chr11	15891000	G	A	0	7	7	100	homozygous
HTM_G351	chr11	27475660	T	C	2	14	16	87.5	homozygous
HTM_G351	chr12	6574834	C	T	1	22	23	95.6522	homozygous
HTM_G351	chr12	24811881	A	G	1	13	14	92.8571	homozygous
HTM_G353	chr01	5506372	T	G	7	12	19	63.1579	heterozygous
HTM_G353	chr01	6493227	AC	A	0	16	16	100	homozygous
HTM_G353	chr01	6521022	AGAC	A	6	4	10	40	heterozygous	5_prime_UTR_variant	MODIFIER	OS01G0218900	Zinc finger%2C PHD-type domain containing protein. (Os01t0218900-01)
HTM_G353	chr01	8232442	G	GA	12	12	24	50	heterozygous
HTM_G353	chr01	15191387	TTCA	T	2	11	13	84.6154	homozygous
HTM_G353	chr01	23529203	CA	C	0	14	14	100	homozygous
HTM_G353	chr01	35132780	C	T	2	19	21	90.4762	homozygous
HTM_G353	chr02	1933896	G	A	0	17	17	100	homozygous
HTM_G353	chr02	6414549	G	GT	0	12	12	100	homozygous
HTM_G353	chr02	9392382	A	G	0	20	20	100	homozygous
HTM_G353	chr02	10296553	G	A	0	15	15	100	homozygous	non_coding_exon_variant	MODIFIER	EPlOSAG00000031744
HTM_G353	chr02	17937406	TGGGGGGGGGG	T	0	10	10	100	homozygous
HTM_G353	chr03	1409456	TCTTCAGA	T	1	26	27	96.2963	homozygous
HTM_G353	chr03	3335608	C	A	0	21	21	100	homozygous
HTM_G353	chr03	3335609	T	A	0	21	21	100	homozygous
HTM_G353	chr03	11381919	AT	A	0	9	9	100	homozygous
HTM_G353	chr03	14824526	T	C	0	6	6	100	homozygous
HTM_G353	chr03	20171770	G	A	1	16	17	94.1176	homozygous
HTM_G353	chr03	29812891	A	T	6	5	11	45.4545	heterozygous
HTM_G353	chr03	31068610	C	T	10	11	21	52.381	heterozygous
HTM_G353	chr04	818954	C	A	0	11	11	100	homozygous
HTM_G353	chr04	4156331	T	C	0	18	18	100	homozygous
HTM_G353	chr04	13850243	G	T	0	18	18	100	homozygous
HTM_G353	chr04	23401471	C	G	0	22	22	100	homozygous
HTM_G353	chr04	29313061	T	C	1	23	24	95.8333	homozygous
HTM_G353	chr05	10469722	G	A	0	14	14	100	homozygous
HTM_G353	chr05	12571281	A	C	0	15	15	100	homozygous
HTM_G353	chr05	13339959	C	G	0	7	7	100	homozygous
HTM_G353	chr05	14625401	A	G	0	12	12	100	homozygous
HTM_G353	chr05	18205135	CTCTG	C	0	16	16	100	homozygous
HTM_G353	chr05	18706129	TA	T	2	13	15	86.6667	homozygous
HTM_G353	chr05	20735871	GATACGAT	G	0	25	25	100	homozygous
HTM_G353	chr05	20891526	G	A	2	17	19	89.4737	homozygous
HTM_G353	chr05	20891527	G	A	2	17	19	89.4737	homozygous
HTM_G353	chr05	22139761	A	G	1	10	11	90.9091	homozygous
HTM_G353	chr06	574762	TGC	T	5	4	9	44.4444	heterozygous
HTM_G353	chr06	1499993	T	A	0	23	23	100	homozygous	intron_variant	MODIFIER	OS06G0128300	Similar to Mitochondrial half-ABC transporter. (Os06t0128300-01)%3BSimilar to STA1 (STARIK 1)%3B ATPase%2C coupled to transmembrane movement of substances. (Os06t0128300-02)%3BSimilar to Mitochondrial half-ABC transporter. (Os06t0128300-03)
HTM_G353	chr06	3485044	G	A	3	10	13	76.9231	homozygous
HTM_G353	chr06	13647203	TAAG	T	1	20	21	95.2381	homozygous
HTM_G353	chr06	14307393	C	CA	1	12	13	92.3077	homozygous
HTM_G353	chr06	18020278	C	T	0	18	18	100	homozygous
HTM_G353	chr06	22340483	G	T	0	12	12	100	homozygous
HTM_G353	chr06	23155366	C	CT	1	8	9	88.8889	homozygous
HTM_G353	chr06	30210967	G	A	13	11	24	45.8333	heterozygous
HTM_G353	chr07	373436	G	A	0	14	14	100	homozygous
HTM_G353	chr07	7053458	C	CTT	1	9	10	90	homozygous
HTM_G353	chr07	7053463	A	G	1	10	11	90.9091	homozygous
HTM_G353	chr07	18878136	C	CT	5	6	11	54.5455	heterozygous
HTM_G353	chr07	19079609	G	A	1	15	16	93.75	homozygous
HTM_G353	chr08	8498954	T	A	0	20	20	100	homozygous	intron_variant	MODIFIER	OS08G0240600	Similar to predicted protein. (Os08t0240600-00)
HTM_G353	chr08	10473409	G	A	0	21	21	100	homozygous
HTM_G353	chr08	11997793	G	A	3	4	7	57.1429	heterozygous
HTM_G353	chr08	18926683	T	C	9	11	20	55	heterozygous
HTM_G353	chr08	19354104	CA	C	0	13	13	100	homozygous
HTM_G353	chr08	19354107	A	AG	0	13	13	100	homozygous
HTM_G353	chr08	20926723	G	A	0	7	7	100	homozygous
HTM_G353	chr08	26330611	GTT	G	0	11	11	100	homozygous
HTM_G353	chr08	27928353	C	T	0	19	19	100	homozygous
HTM_G353	chr09	5487801	G	A	1	18	19	94.7368	homozygous	intron_variant	MODIFIER	OS09G0272900	Disease resistance protein domain containing protein. (Os09t0272900-01)%3BHypothetical conserved gene. (Os09t0272900-02)
HTM_G353	chr09	10695739	T	A	11	9	20	45	heterozygous
HTM_G353	chr09	14977386	C	T	0	7	7	100	homozygous	splice_donor_variant&intron_variant	HIGH	OS09G0417600	WRKY transcription factor 76. (Os09t0417600-01)%3BWRKY transcription factor 76. (Os09t0417600-02)
HTM_G353	chr09	15217377	T	C	2	9	11	81.8182	homozygous
HTM_G353	chr10	1218908	G	A	0	12	12	100	homozygous
HTM_G353	chr10	1644600	A	C	0	15	15	100	homozygous	missense_variant	MODERATE	OS10G0125700	NB-ARC domain containing protein. (Os10t0125700-00)
HTM_G353	chr10	6914927	TAGTAGTTG	T	0	18	18	100	homozygous
HTM_G353	chr10	13448948	T	C	0	18	18	100	homozygous
HTM_G353	chr11	1297482	C	T	2	17	19	89.4737	homozygous
HTM_G353	chr11	5946413	G	A	0	12	12	100	homozygous
HTM_G353	chr11	5948700	C	A	0	20	20	100	homozygous
HTM_G353	chr11	11155523	T	C	0	17	17	100	homozygous
HTM_G353	chr11	11808777	C	T	3	9	12	75	homozygous
HTM_G353	chr11	19659003	T	A	0	15	15	100	homozygous
HTM_G353	chr11	25148270	CCCGCGGTAAGCCCGGTAA	C	0	13	13	100	homozygous
HTM_G353	chr12	591573	CA	C	1	13	14	92.8571	homozygous
HTM_G353	chr12	3803572	A	G	0	18	18	100	homozygous
HTM_G353	chr12	7229635	T	G	7	13	20	65	heterozygous
HTM_G354	chr01	23371	T	G	1	13	14	92.8571	homozygous
HTM_G354	chr01	2360480	A	AT	0	11	11	100	homozygous
HTM_G354	chr01	2859340	T	C	1	13	14	92.8571	homozygous	5_prime_UTR_premature_start_codon_gain_variant	LOW	OS01G0153150	Hypothetical conserved gene. (Os01t0153150-01)
HTM_G354	chr01	9408925	T	C	0	23	23	100	homozygous
HTM_G354	chr01	17261553	C	T	0	13	13	100	homozygous
HTM_G354	chr01	19601481	T	A	9	15	24	62.5	heterozygous
HTM_G354	chr01	24100994	GA	G	1	7	8	87.5	homozygous
HTM_G354	chr01	27754541	A	G	5	8	13	61.5385	heterozygous
HTM_G354	chr01	28359661	GCTATTGAGTTTTT	G	0	12	12	100	homozygous
HTM_G354	chr01	29806780	G	GCTCTCT	5	4	9	44.4444	heterozygous	5_prime_UTR_variant	MODIFIER	OS01G0716200	IQ calmodulin-binding region domain containing protein. (Os01t0716200-01)%3BSimilar to Calmodulin binding protein. (Os01t0716200-02)%3BIQ calmodulin-binding region domain containing protein. (Os01t0716200-03)
HTM_G354	chr01	35404027	G	T	0	12	12	100	homozygous	missense_variant	MODERATE	OS01G0827300	Similar to Laccase precursor (EC 1.10.3.2). (Os01t0827300-01)
HTM_G354	chr01	38944576	C	T	0	14	14	100	homozygous
HTM_G354	chr02	1920732	C	T	0	18	18	100	homozygous
HTM_G354	chr02	25860324	C	T	0	10	10	100	homozygous	intron_variant	MODIFIER	OS02G0643600	Similar to H0502G05.5 protein. (Os02t0643600-00)
HTM_G354	chr02	31355973	G	A	0	16	16	100	homozygous
HTM_G354	chr02	32561230	A	T	1	9	10	90	homozygous	intron_variant	MODIFIER	OS02G0771600	Similar to 1-aminocyclopropane-1-carboxylate oxidase (Fragment). (Os02t0771600-01)%3BSimilar to 1-aminocyclopropane-1-carboxylate oxidase (Fragment). (Os02t0771600-02)
HTM_G354	chr03	310061	G	A	1	9	10	90	homozygous	3_prime_UTR_variant	MODIFIER	OS03G0104901	Conserved hypothetical protein. (Os03t0104901-01)
HTM_G354	chr03	10041602	T	C	0	13	13	100	homozygous	intron_variant	MODIFIER	OS03G0289800	Similar to Leucoanthocyanidin dioxygenase-like protein. (Os03t0289800-01)
HTM_G354	chr03	18098728	G	A	0	16	16	100	homozygous
HTM_G354	chr03	24374576	G	A	9	7	16	43.75	heterozygous
HTM_G354	chr03	31782747	A	C	3	9	12	75	homozygous
HTM_G354	chr03	35371352	G	A	0	7	7	100	homozygous
HTM_G354	chr04	2683573	G	C	0	5	5	100	homozygous
HTM_G354	chr04	4692925	C	T	0	12	12	100	homozygous
HTM_G354	chr04	7163832	ACCT	A	0	7	7	100	homozygous	inframe_deletion	MODERATE	OS04G0206700	UDP-glucuronosyl/UDP-glucosyltransferase family protein. (Os04t0206700-01)%3BUDP-glucuronosyl/UDP-glucosyltransferase family protein. (Os04t0206700-02)
HTM_G354	chr04	7822525	G	A	0	21	21	100	homozygous
HTM_G354	chr04	10951870	C	T	0	6	6	100	homozygous
HTM_G354	chr04	11148147	GAAAGATAGAATCC	G	0	13	13	100	homozygous
HTM_G354	chr04	12559058	T	C	0	14	14	100	homozygous
HTM_G354	chr04	24633099	A	G	0	10	10	100	homozygous
HTM_G354	chr04	27883523	GGA	G	4	6	10	60	heterozygous	intron_variant	MODIFIER	OS04G0557200	Similar to Anthocyanin regulatory B protein (Fragment). (Os04t0557200-01)
HTM_G354	chr04	32127069	C	T	0	9	9	100	homozygous
HTM_G354	chr04	32897803	C	CAG	0	17	17	100	homozygous
HTM_G354	chr04	34230928	A	G	1	11	12	91.6667	homozygous
HTM_G354	chr05	949197	CT	C	0	12	12	100	homozygous	frameshift_variant	HIGH	OS05G0117864	Conserved hypothetical protein. (Os05t0117864-01)
HTM_G354	chr05	5408076	C	T	4	11	15	73.3333	heterozygous
HTM_G354	chr05	6599012	TGAACATTACTACCA	T	2	10	12	83.3333	homozygous
HTM_G354	chr05	9283706	G	C	0	17	17	100	homozygous
HTM_G354	chr05	13891245	A	G	0	11	11	100	homozygous
HTM_G354	chr05	27881976	GT	G	1	17	18	94.4444	homozygous	intron_variant	MODIFIER	OS05G0560100	Similar to Pollen-specific kinase partner protein. (Os05t0560100-01)
HTM_G354	chr05	29922307	G	A	0	15	15	100	homozygous
HTM_G354	chr06	5964452	G	A	0	10	10	100	homozygous
HTM_G354	chr06	7942103	C	T	10	7	17	41.1765	heterozygous
HTM_G354	chr06	9499381	A	G	2	17	19	89.4737	homozygous
HTM_G354	chr06	11443765	C	A	1	17	18	94.4444	homozygous	intron_variant	MODIFIER	OS06G0303400	Similar to aconitate hydratase%2C cytoplasmic. (Os06t0303400-00)
HTM_G354	chr06	13564973	C	T	0	15	15	100	homozygous
HTM_G354	chr06	18104836	G	T	0	12	12	100	homozygous
HTM_G354	chr06	24155641	T	A	7	6	13	46.1538	heterozygous
HTM_G354	chr06	30583119	A	T	0	14	14	100	homozygous	5_prime_UTR_variant	MODIFIER	OS06G0720100	Hypothetical gene. (Os06t0720100-00)
HTM_G354	chr07	3862313	C	T	6	13	19	68.4211	heterozygous
HTM_G354	chr07	4246304	A	G	2	16	18	88.8889	homozygous	intron_variant	MODIFIER	OS07G0180700	Similar to Major facilitator superfamily antiporter. (Os07t0180700-01)
HTM_G354	chr07	12038346	G	A	0	16	16	100	homozygous
HTM_G354	chr07	14556891	A	AC	2	11	13	84.6154	homozygous
HTM_G354	chr07	17718027	TATTTA	T	0	14	14	100	homozygous
HTM_G354	chr07	19552458	G	A	12	10	22	45.4545	heterozygous
HTM_G354	chr07	22709702	C	T	0	11	11	100	homozygous
HTM_G354	chr07	23144086	G	A	0	7	7	100	homozygous
HTM_G354	chr07	23178790	AG	A	0	6	6	100	homozygous	intron_variant	MODIFIER	OS07G0573400	Protein of unknown function DUF239%2C plant domain containing protein. (Os07t0573400-01)%3BProtein of unknown function DUF239%2C plant domain containing protein. (Os07t0573400-02)
HTM_G354	chr08	4329915	G	A	0	17	17	100	homozygous
HTM_G354	chr08	13533445	G	T	0	13	13	100	homozygous
HTM_G354	chr08	14324734	ACATAACAGTTGAAGT	A	0	9	9	100	homozygous
HTM_G354	chr08	15986909	C	T	6	4	10	40	heterozygous
HTM_G354	chr09	903704	G	T	1	21	22	95.4545	homozygous
HTM_G354	chr09	6407769	TC	T	0	10	10	100	homozygous
HTM_G354	chr09	10570098	T	C	1	9	10	90	homozygous
HTM_G354	chr09	18770523	C	A	6	4	10	40	heterozygous	missense_variant	MODERATE	OS09G0486700	Similar to P90 ribosomal S6 kinase. (Os09t0486700-01)
HTM_G354	chr10	1063253	CATGT	C	0	21	21	100	homozygous
HTM_G354	chr10	7293310	ATACCACC	A	0	18	18	100	homozygous
HTM_G354	chr10	11854276	C	T	0	13	13	100	homozygous
HTM_G354	chr10	14566823	GTCGT	G	0	16	16	100	homozygous
HTM_G354	chr10	14566828	AC	A	0	16	16	100	homozygous
HTM_G354	chr10	21921161	T	C	5	4	9	44.4444	heterozygous
HTM_G354	chr10	22630970	T	A	0	13	13	100	homozygous	splice_region_variant&intron_variant	LOW	OS10G0570800	Hypothetical conserved gene. (Os10t0570800-00)
HTM_G354	chr11	3567693	T	A	0	18	18	100	homozygous
HTM_G354	chr11	27092300	G	A	0	15	15	100	homozygous	intron_variant	MODIFIER	OS11G0670700	Similar to EAP30 family protein. (Os11t0670700-00)
HTM_G354	chr12	448628	T	A	0	12	12	100	homozygous
HTM_G354	chr12	2090593	T	C	1	12	13	92.3077	homozygous	5_prime_UTR_variant	MODIFIER	OS12G0142600	DTW domain containing protein. (Os12t0142600-01)
HTM_G354	chr12	11302025	C	T	0	12	12	100	homozygous	missense_variant	MODERATE	OS12G0292200	Hypothetical gene. (Os12t0292200-01)
HTM_G354	chr12	15378556	G	T	0	12	12	100	homozygous
HTM_G354	chr12	17329098	C	T	0	14	14	100	homozygous
HTM_G354	chr12	17898303	T	TA	0	11	11	100	homozygous
HTM_G354	chr12	20416417	C	T	3	10	13	76.9231	homozygous
HTM_G354	chr12	23412797	AT	A	1	12	13	92.3077	homozygous
HTM_G355	chr01	3029144	C	T	4	4	8	50	heterozygous
HTM_G355	chr01	10063880	A	T	0	22	22	100	homozygous
HTM_G355	chr01	16107473	T	G	0	16	16	100	homozygous
HTM_G355	chr01	18504003	G	A	5	11	16	68.75	heterozygous
HTM_G355	chr01	25134840	GA	G	1	17	18	94.4444	homozygous	5_prime_UTR_variant	MODIFIER	OS01G0629400	NLI interacting factor domain containing protein. (Os01t0629400-01)%3BSimilar to Ctd-phosphatase-like protein (Fragment). (Os01t0629400-02)
HTM_G355	chr01	29494384	A	G	0	20	20	100	homozygous
HTM_G355	chr01	33471576	A	T	0	24	24	100	homozygous
HTM_G355	chr01	34110308	T	C	1	10	11	90.9091	homozygous
HTM_G355	chr01	34976915	T	C	0	15	15	100	homozygous
HTM_G355	chr02	5687501	GCA	G	0	18	18	100	homozygous
HTM_G355	chr02	7385681	A	C	0	22	22	100	homozygous
HTM_G355	chr02	24269371	GGTAT	G	0	15	15	100	homozygous	frameshift_variant	HIGH	OS02G0614400	Peptidase aspartic%2C active site domain containing protein. (Os02t0614400-01)
HTM_G355	chr02	30106130	G	T	1	24	25	96	homozygous	intron_variant	MODIFIER	OS02G0724500	Similar to transporter-related. (Os02t0724500-00)
HTM_G355	chr02	32930964	C	T	0	5	5	100	homozygous
HTM_G355	chr03	1923619	T	TA	0	15	15	100	homozygous
HTM_G355	chr03	6687603	A	T	18	15	33	45.4545	heterozygous
HTM_G355	chr03	13621730	G	A	2	14	16	87.5	homozygous
HTM_G355	chr03	13817544	G	T	0	16	16	100	homozygous
HTM_G355	chr03	18258690	A	G	1	24	25	96	homozygous
HTM_G355	chr03	24824040	C	T	0	21	21	100	homozygous
HTM_G355	chr03	31887078	T	A	0	20	20	100	homozygous
HTM_G355	chr03	32411737	C	T	0	23	23	100	homozygous
HTM_G355	chr03	33716084	T	G	0	8	8	100	homozygous
HTM_G355	chr04	559391	AT	A	1	26	27	96.2963	homozygous
HTM_G355	chr04	3177023	G	A	0	7	7	100	homozygous
HTM_G355	chr04	6128871	CAT	C	1	13	14	92.8571	homozygous
HTM_G355	chr04	22603396	T	C	11	8	19	42.1053	heterozygous
HTM_G355	chr04	27751515	G	A	0	16	16	100	homozygous
HTM_G355	chr04	29017045	G	A	8	7	15	46.6667	heterozygous
HTM_G355	chr04	30289064	GT	G	2	18	20	90	homozygous	intron_variant	MODIFIER	OS04G0600200	Homodimeric diiron-carboxylate protein%2C Cyanide-resistant respiration in mitochondria%2C Reactive oxygen species (ROS) scavenging (Os04t0600200-01)
HTM_G355	chr04	30289066	T	G	2	18	20	90	homozygous	intron_variant	MODIFIER	OS04G0600200	Homodimeric diiron-carboxylate protein%2C Cyanide-resistant respiration in mitochondria%2C Reactive oxygen species (ROS) scavenging (Os04t0600200-01)
HTM_G355	chr04	31301375	GT	G	1	9	10	90	homozygous
HTM_G355	chr04	34282615	A	AT	1	24	25	96	homozygous	frameshift_variant&stop_gained&splice_region_variant	HIGH	OS04G0671900	Transcription factor%2C Regulator for phosphate homeostasis (Os04t0671900-01)%3BSimilar to Auxin response factor 12. (Os04t0671900-02)%3BSimilar to Auxin response factor 12. (Os04t0671900-03)
HTM_G355	chr05	3233279	C	T	0	13	13	100	homozygous	3_prime_UTR_variant	MODIFIER	OS05G0155200	Similar to Ethylene receptor. (Os05t0155200-01)%3BSimilar to Ethylene receptor-like protein (Fragment). (Os05t0155200-02)
HTM_G355	chr05	5846187	C	CA	7	5	12	41.6667	heterozygous
HTM_G355	chr05	9947365	T	A	11	8	19	42.1053	heterozygous
HTM_G355	chr05	14886986	G	C	0	12	12	100	homozygous
HTM_G355	chr05	15946692	C	T	0	13	13	100	homozygous
HTM_G355	chr06	5781810	G	T	0	17	17	100	homozygous
HTM_G355	chr06	19044452	T	A	5	4	9	44.4444	heterozygous
HTM_G355	chr06	22082533	GT	G	7	5	12	41.6667	heterozygous	3_prime_UTR_variant	MODIFIER	OS06G0570400	Hypothetical protein. (Os06t0570400-01)%3BHypothetical protein. (Os06t0570400-02)
HTM_G355	chr06	22306288	CA	C	1	21	22	95.4545	homozygous
HTM_G355	chr06	22516552	C	T	6	11	17	64.7059	heterozygous
HTM_G355	chr06	27284916	T	TAGAG	0	7	7	100	homozygous	5_prime_UTR_variant	MODIFIER	OS06G0661900	Protein of unknown function DUF266%2C plant family protein. (Os06t0661900-01)
HTM_G355	chr06	30329572	G	A	0	12	12	100	homozygous
HTM_G355	chr07	1221503	A	AT	0	22	22	100	homozygous
HTM_G355	chr07	1803479	GC	G	0	6	6	100	homozygous
HTM_G355	chr07	16098030	AT	A	6	5	11	45.4545	heterozygous
HTM_G355	chr08	5862989	T	A	0	10	10	100	homozygous
HTM_G355	chr08	12018337	C	CT	1	13	14	92.8571	homozygous
HTM_G355	chr08	12706210	C	A	0	13	13	100	homozygous
HTM_G355	chr08	15569694	TCTC	T	0	17	17	100	homozygous
HTM_G355	chr08	16709753	C	T	2	8	10	80	homozygous
HTM_G355	chr08	17450207	C	T	1	6	7	85.7143	homozygous
HTM_G355	chr08	18864342	G	A	0	14	14	100	homozygous
HTM_G355	chr09	1093500	C	G	1	17	18	94.4444	homozygous
HTM_G355	chr09	1291455	CAA	C	0	16	16	100	homozygous	5_prime_UTR_variant	MODIFIER	OS09G0116100	Conserved hypothetical protein. (Os09t0116100-01)
HTM_G355	chr09	1291459	A	C	0	16	16	100	homozygous	5_prime_UTR_variant	MODIFIER	OS09G0116100	Conserved hypothetical protein. (Os09t0116100-01)
HTM_G355	chr09	1491001	TC	T	5	6	11	54.5455	heterozygous
HTM_G355	chr09	6892708	G	T	2	9	11	81.8182	homozygous
HTM_G355	chr09	15098953	G	A	8	8	16	50	heterozygous
HTM_G355	chr09	21404551	T	A	0	26	26	100	homozygous
HTM_G355	chr10	10247763	AG	A	1	14	15	93.3333	homozygous	intron_variant	MODIFIER	OS10G0344500	Similar to cDNA clone:001-128-E01%2C full insert sequence. (Os10t0344500-00)
HTM_G355	chr10	13666583	C	T	0	16	16	100	homozygous
HTM_G355	chr10	15369197	GATTTCATGGAAGCTTATA	G	4	4	8	50	heterozygous
HTM_G355	chr10	19889750	T	C	0	14	14	100	homozygous
HTM_G355	chr10	22408435	G	A	0	15	15	100	homozygous	intron_variant	MODIFIER	OS10G0565700	Similar to SNF2 family N-terminal domain containing protein. (Os10t0565700-01)%3BSimilar to SNF2 family N-terminal domain containing protein. (Os10t0565700-02)
HTM_G355	chr11	4044371	G	A	0	15	15	100	homozygous
HTM_G355	chr11	6452809	T	A	0	16	16	100	homozygous
HTM_G355	chr11	19867911	T	A	5	5	10	50	heterozygous	intron_variant	MODIFIER	OS11G0541600	Protein of unknown function DUF247%2C plant domain containing protein. (Os11t0541600-00)
HTM_G355	chr11	25489684	G	A	1	18	19	94.7368	homozygous
HTM_G355	chr12	4992981	C	A	0	13	13	100	homozygous
HTM_G355	chr12	6616452	G	GA	0	16	16	100	homozygous
HTM_G355	chr12	16656391	A	G	10	8	18	44.4444	heterozygous
HTM_G355	chr12	19481203	A	G	0	18	18	100	homozygous
HTM_G355	chr12	21644807	G	T	1	4	5	80	homozygous
HTM_G355	chr12	26124541	A	T	0	14	14	100	homozygous	missense_variant	MODERATE	OS12G0615800	D111/G-patch domain containing protein. (Os12t0615800-01)
HTM_I154	chr01	10713470	G	A	0	12	12	100	homozygous
HTM_I154	chr01	22046658	C	A	1	12	13	92.3077	homozygous
HTM_I154	chr01	32800187	A	AT	1	20	21	95.2381	homozygous
HTM_I154	chr01	36836453	C	T	0	15	15	100	homozygous
HTM_I154	chr01	42254297	C	T	0	19	19	100	homozygous	3_prime_UTR_variant	MODIFIER	OS01G0958500	Similar to RNA binding protein-like. (Os01t0958500-01)
HTM_I154	chr02	1236214	T	A	2	12	14	85.7143	homozygous
HTM_I154	chr02	19285835	A	G	0	14	14	100	homozygous
HTM_I154	chr02	23644987	GA	G	1	16	17	94.1176	homozygous	intron_variant	MODIFIER	OS02G0603600	Conserved hypothetical protein. (Os02t0603600-01)
HTM_I154	chr02	27551421	A	T	7	5	12	41.6667	heterozygous	3_prime_UTR_variant	MODIFIER	OS02G0675800	Cyclin-like F-box domain containing protein. (Os02t0675800-01)
HTM_I154	chr02	30594148	T	G	0	11	11	100	homozygous	intron_variant	MODIFIER	OS02G0733800	SET domain containing protein. (Os02t0733800-01)
HTM_I154	chr03	19002782	C	G	0	12	12	100	homozygous
HTM_I154	chr03	22361907	G	A	9	11	20	55	heterozygous
HTM_I154	chr03	24074539	C	T	1	15	16	93.75	homozygous
HTM_I154	chr03	36407797	C	T	1	11	12	91.6667	homozygous	intron_variant	MODIFIER	OS03G0862300	Non-protein coding transcript. (Os03t0862300-00)
HTM_I154	chr04	554212	C	CTTG	0	11	11	100	homozygous
HTM_I154	chr04	17018035	G	A	0	9	9	100	homozygous
HTM_I154	chr04	19148864	G	T	0	6	6	100	homozygous	missense_variant	MODERATE	OS04G0389500	Conserved hypothetical protein. (Os04t0389500-01)
HTM_I154	chr04	24383233	A	G	1	13	14	92.8571	homozygous	missense_variant	MODERATE	OS04G0488100	Rad21/Rec8 like protein%2C C-terminal domain containing protein. (Os04t0488100-01)
HTM_I154	chr04	27003398	A	G	1	19	20	95	homozygous
HTM_I154	chr04	30954243	TAAA	T	0	24	24	100	homozygous	3_prime_UTR_variant	MODIFIER	OS04G0610700	Similar to Potassium transporter 13 (AtPOT13) (AtKT5). (Os04t0610700-01)%3BSimilar to OSIGBa0152L12.8 protein. (Os04t0610700-02)
HTM_I154	chr05	3071008	C	T	1	13	14	92.8571	homozygous	intron_variant	MODIFIER	OS05G0153300	Lipase%2C class 3 domain containing protein. (Os05t0153300-00)
HTM_I154	chr05	3461282	C	T	1	12	13	92.3077	homozygous	3_prime_UTR_variant	MODIFIER	OS05G0158600	Similar to OsGA2ox1. (Os05t0158600-01)%3BGA 2-oxidase1%2C GA metabolism (Os05t0158600-02)
HTM_I154	chr05	7888296	G	A	0	10	10	100	homozygous
HTM_I154	chr05	8232485	G	GA	0	7	7	100	homozygous
HTM_I154	chr05	8232490	G	A	0	7	7	100	homozygous
HTM_I154	chr05	8232491	GAAAACC	G	0	6	6	100	homozygous
HTM_I154	chr05	10229608	C	T	0	16	16	100	homozygous
HTM_I154	chr05	10593968	CG	C	0	21	21	100	homozygous
HTM_I154	chr05	15290319	G	C	0	14	14	100	homozygous
HTM_I154	chr05	19942257	G	A	0	18	18	100	homozygous
HTM_I154	chr05	20853998	GTTAAA	G	1	15	16	93.75	homozygous
HTM_I154	chr05	28998944	CGATTGCTACAAATG	C	0	16	16	100	homozygous
HTM_I154	chr06	9825103	A	G	2	17	19	89.4737	homozygous
HTM_I154	chr07	6412358	C	T	6	4	10	40	heterozygous
HTM_I154	chr07	14017627	C	T	5	6	11	54.5455	heterozygous
HTM_I154	chr07	25890669	T	C	0	14	14	100	homozygous
HTM_I154	chr08	241159	A	G	6	4	10	40	heterozygous
HTM_I154	chr08	1410247	C	G	0	16	16	100	homozygous
HTM_I154	chr08	9884451	G	A	3	7	10	70	heterozygous
HTM_I154	chr08	10128557	A	C	0	7	7	100	homozygous
HTM_I154	chr08	14141086	C	T	10	10	20	50	heterozygous
HTM_I154	chr08	15637215	C	T	0	12	12	100	homozygous
HTM_I154	chr09	674657	C	T	0	10	10	100	homozygous
HTM_I154	chr09	7634087	G	A	4	6	10	60	heterozygous
HTM_I154	chr09	8011103	G	A	2	8	10	80	homozygous
HTM_I154	chr09	14945525	G	A	0	19	19	100	homozygous
HTM_I154	chr09	16981932	A	T	2	19	21	90.4762	homozygous	intron_variant	MODIFIER	OS09G0452900	Glycosyl transferase%2C family 31 protein. (Os09t0452900-01)
HTM_I154	chr09	17495575	AGCCTGCCT	A	0	16	16	100	homozygous
HTM_I154	chr10	514978	C	T	1	13	14	92.8571	homozygous
HTM_I154	chr10	11657966	GT	G	0	6	6	100	homozygous
HTM_I154	chr10	13543765	C	CCT	1	12	13	92.3077	homozygous	intron_variant	MODIFIER	OS10G0400900	Similar to Colon cancer-associated protein Mic1-like containing protein%2C expressed. (Os10t0400900-01)%3BSimilar to Colon cancer-associated protein Mic1-like containing protein%2C expressed. (Os10t0400900-02)
HTM_I154	chr10	19215049	C	T	0	18	18	100	homozygous	synonymous_variant	LOW	OS10G0503300	Similar to 10-deacetylbaccatin III 10-O-acetyltransferase. (Os10t0503300-00)
HTM_I154	chr11	14620638	G	A	1	15	16	93.75	homozygous
HTM_I154	chr12	11560415	TCAACCCTG	T	7	7	14	50	heterozygous
HTM_I154	chr12	11695941	AT	A	5	4	9	44.4444	heterozygous
HTM_I154	chr12	11831216	A	G	10	13	23	56.5217	heterozygous
HTM_I154	chr12	21396282	C	T	2	5	7	71.4286	heterozygous
HTM_I154	chr12	21605968	G	A	0	13	13	100	homozygous
HTM_I154	chr12	21697863	GAAAA	G	0	11	11	100	homozygous
HTM_I154	chr12	25731416	CG	C	1	9	10	90	homozygous
HTM_I154	chr12	25731418	TGATGCAGTCAAGCGCAGCAACAGCCGCC	T	1	9	10	90	homozygous
HTM_I218	chr01	430147	A	ATGGATTGATGAAGGCTGGGCCTTGCGGAAAGTTTTGCTTGATGTC	2	12	14	85.7143	homozygous	intron_variant	MODIFIER	OS01G0108000	Conserved hypothetical protein. (Os01t0108000-01)
HTM_I218	chr01	1084398	G	GCA	3	28	31	90.3226	homozygous
HTM_I218	chr01	2616565	TGCACAC	T	0	23	23	100	homozygous
HTM_I218	chr01	5011708	TA	T	1	25	26	96.1538	homozygous
HTM_I218	chr01	6538360	T	C	0	12	12	100	homozygous
HTM_I218	chr01	6939078	G	A	1	18	19	94.7368	homozygous
HTM_I218	chr01	9398634	T	G	0	25	25	100	homozygous
HTM_I218	chr01	18342420	T	C	0	28	28	100	homozygous
HTM_I218	chr01	22292627	T	C	9	12	21	57.1429	heterozygous
HTM_I218	chr01	24203169	C	T	1	18	19	94.7368	homozygous
HTM_I218	chr01	26251261	A	G	0	23	23	100	homozygous	intron_variant	MODIFIER	OS01G0650200	Lipase%2C GDSL domain containing protein. (Os01t0650200-01)%3BSimilar to Esterase. (Os01t0650200-02)%3BSimilar to esterase. (Os01t0650200-03)
HTM_I218	chr01	36848719	T	C	15	10	25	40	heterozygous
HTM_I218	chr02	9233525	C	T	0	19	19	100	homozygous
HTM_I218	chr02	18210107	A	G	2	13	15	86.6667	homozygous
HTM_I218	chr02	19055717	G	A	0	25	25	100	homozygous
HTM_I218	chr02	23084533	G	A	0	16	16	100	homozygous	missense_variant	MODERATE	OS02G0595100	Similar to N-acetylglucosaminyltransferase III. (Os02t0595100-01)%3BSimilar to N-acetylglucosaminyltransferase III. (Os02t0595100-02)
HTM_I218	chr02	26621355	A	G	0	24	24	100	homozygous	3_prime_UTR_variant	MODIFIER	OS02G0658300	Conserved hypothetical protein. (Os02t0658300-01)
HTM_I218	chr03	14301791	AT	A	1	8	9	88.8889	homozygous
HTM_I218	chr03	25412366	C	T	5	8	13	61.5385	heterozygous
HTM_I218	chr03	27151464	T	G	0	23	23	100	homozygous
HTM_I218	chr03	32060705	TATACTATAATTTTA	T	0	9	9	100	homozygous
HTM_I218	chr04	1007654	GATA	G	0	14	14	100	homozygous
HTM_I218	chr04	10311578	TGTTGTG	T	0	20	20	100	homozygous
HTM_I218	chr04	11667484	G	A	0	5	5	100	homozygous
HTM_I218	chr04	12040019	C	T	0	17	17	100	homozygous
HTM_I218	chr04	16030418	C	T	12	10	22	45.4545	heterozygous
HTM_I218	chr04	18718809	T	C	10	14	24	58.3333	heterozygous
HTM_I218	chr04	21878436	AT	A	1	16	17	94.1176	homozygous
HTM_I218	chr04	23790625	C	T	0	27	27	100	homozygous
HTM_I218	chr04	29783603	G	T	0	13	13	100	homozygous
HTM_I218	chr04	30165361	C	A	0	20	20	100	homozygous	3_prime_UTR_variant	MODIFIER	OS04G0597800	TGF-beta receptor%2C type I/II extracellular region family protein. (Os04t0597800-01)
HTM_I218	chr05	12739798	CT	C	2	6	8	75	homozygous
HTM_I218	chr05	14124590	C	T	1	14	15	93.3333	homozygous
HTM_I218	chr05	15980120	T	A	1	5	6	83.3333	homozygous
HTM_I218	chr06	10931064	C	A	1	27	28	96.4286	homozygous
HTM_I218	chr06	13076173	C	T	0	16	16	100	homozygous
HTM_I218	chr06	19808846	G	A	13	11	24	45.8333	heterozygous
HTM_I218	chr06	20812732	C	T	1	27	28	96.4286	homozygous	missense_variant	MODERATE	OS06G0549633	Similar to reticuline oxidase. (Os06t0549633-00)
HTM_I218	chr07	866416	C	T	0	16	16	100	homozygous
HTM_I218	chr07	5335122	T	A	2	21	23	91.3043	homozygous
HTM_I218	chr07	10541869	G	C	0	21	21	100	homozygous
HTM_I218	chr07	15994261	C	G	15	14	29	48.2759	heterozygous
HTM_I218	chr08	8665547	T	C	11	11	22	50	heterozygous
HTM_I218	chr08	10561806	G	A	0	21	21	100	homozygous
HTM_I218	chr08	14060046	A	T	0	9	9	100	homozygous
HTM_I218	chr08	19751362	T	TTCTA	1	8	9	88.8889	homozygous
HTM_I218	chr08	22537506	A	T	0	17	17	100	homozygous
HTM_I218	chr08	23939602	C	G	0	12	12	100	homozygous
HTM_I218	chr09	13299307	A	G	10	10	20	50	heterozygous
HTM_I218	chr10	1953451	C	CA	3	9	12	75	homozygous
HTM_I218	chr10	4833948	T	G	0	17	17	100	homozygous
HTM_I218	chr10	21668062	G	A	5	5	10	50	heterozygous
HTM_I218	chr11	1797255	G	T	0	14	14	100	homozygous
HTM_I218	chr11	15251110	A	G	1	21	22	95.4545	homozygous
HTM_I218	chr11	20994659	A	AGGAGGGGAACATGGAGAGGGATGC	5	9	14	64.2857	heterozygous
HTM_I218	chr12	9572604	T	TA	0	11	11	100	homozygous
HTM_I218	chr12	9874821	CCCTCTGTAGGTTA	C	0	24	24	100	homozygous
HTM_I218	chr12	9875574	A	T	0	19	19	100	homozygous
HTM_I218	chr12	15448180	A	ACG	0	21	21	100	homozygous
HTM_I218	chr12	18731671	C	CA	0	13	13	100	homozygous
HTM_I218	chr12	21298241	C	T	2	22	24	91.6667	homozygous
HTM_I218	chr12	21670520	G	A	10	14	24	58.3333	heterozygous
HTM_I218	chr12	24965269	A	ACGTCCTCGACCTC	0	6	6	100	homozygous	intron_variant	MODIFIER	OS12G0594700	Similar to F-box domain containing protein. (Os12t0594700-00)
HTM_I218	chr12	24965271	T	TCCGCCTCGGCTACCTCTTCTCCCCGCGCTGGCTCGACATCTG	0	5	5	100	homozygous	intron_variant	MODIFIER	OS12G0594700	Similar to F-box domain containing protein. (Os12t0594700-00)
HTM_I221	chr01	5400586	AT	A	5	12	17	70.5882	heterozygous	intron_variant	MODIFIER	OS01G0199700	Protein of unknown function DUF1677%2C plant domain containing protein. (Os01t0199700-00)
HTM_I221	chr01	11668169	C	T	0	17	17	100	homozygous
HTM_I221	chr01	19948278	T	A	1	20	21	95.2381	homozygous
HTM_I221	chr01	24179682	CACATGGAAGA	C	0	12	12	100	homozygous
HTM_I221	chr01	25632381	C	G	3	14	17	82.3529	homozygous
HTM_I221	chr01	27802987	G	GT	0	19	19	100	homozygous
HTM_I221	chr02	8998738	AT	A	0	13	13	100	homozygous
HTM_I221	chr02	14385505	G	A	0	15	15	100	homozygous
HTM_I221	chr02	14462833	G	A	0	18	18	100	homozygous
HTM_I221	chr02	15146950	G	A	1	20	21	95.2381	homozygous
HTM_I221	chr02	19861775	A	G	0	21	21	100	homozygous
HTM_I221	chr02	23158911	A	C	0	11	11	100	homozygous
HTM_I221	chr02	24556600	CA	C	0	19	19	100	homozygous
HTM_I221	chr02	26536277	C	G	0	22	22	100	homozygous
HTM_I221	chr02	26536278	T	C	0	22	22	100	homozygous
HTM_I221	chr03	16947976	T	A	5	6	11	54.5455	heterozygous
HTM_I221	chr03	30833613	A	AT	6	8	14	57.1429	heterozygous
HTM_I221	chr03	34644621	TCTCCAGCAGA	T	0	11	11	100	homozygous
HTM_I221	chr04	3635827	G	A	7	13	20	65	heterozygous	synonymous_variant	LOW	OS04G0153000	Similar to OSIGBa0147M20.4 protein. (Os04t0153000-00)
HTM_I221	chr04	13267060	C	T	2	22	24	91.6667	homozygous
HTM_I221	chr04	16223017	C	T	0	27	27	100	homozygous
HTM_I221	chr04	25489575	T	C	0	14	14	100	homozygous
HTM_I221	chr04	29145581	C	T	2	16	18	88.8889	homozygous
HTM_I221	chr04	32263296	C	T	2	22	24	91.6667	homozygous
HTM_I221	chr06	15574934	T	G	0	20	20	100	homozygous
HTM_I221	chr08	1167773	GC	G	0	14	14	100	homozygous
HTM_I221	chr08	1520277	A	T	0	15	15	100	homozygous
HTM_I221	chr08	2036320	TCGCCGCGCGCG	T	0	6	6	100	homozygous	frameshift_variant	HIGH	OS08G0136100	Similar to Roc1. (Os08t0136100-01)
HTM_I221	chr08	5319872	GATAAGCTACCGTGGTCCCAAACAGTTGGATGGGTCTTTATAAACATTCC	G	0	15	15	100	homozygous	intron_variant	MODIFIER	OS08G0190800	Postsynaptic protein CRIPT. (Os08t0190800-01)
HTM_I221	chr08	5320330	C	T	0	17	17	100	homozygous	intron_variant	MODIFIER	OS08G0190800	Postsynaptic protein CRIPT. (Os08t0190800-01)
HTM_I221	chr08	5507065	C	A	0	22	22	100	homozygous
HTM_I221	chr08	6556546	G	A	9	14	23	60.8696	heterozygous	intron_variant	MODIFIER	OS08G0211750	Conserved hypothetical protein. (Os08t0211750-01)
HTM_I221	chr08	13189467	A	T	1	9	10	90	homozygous
HTM_I221	chr08	20180382	T	A	0	13	13	100	homozygous
HTM_I221	chr08	21547340	G	T	11	12	23	52.1739	heterozygous
HTM_I221	chr08	25106748	A	AAG	3	8	11	72.7273	heterozygous
HTM_I221	chr09	19821392	CAAGATGCGCAGAAGG	C	12	12	24	50	heterozygous
HTM_I221	chr09	20058405	AAACAGTT	A	4	12	16	75	homozygous
HTM_I221	chr09	20383031	T	G	5	10	15	66.6667	heterozygous	intron_variant	MODIFIER	OS09G0521800	Similar to SPX domain-containing membrane protein OsI_32082. (Os09t0521800-00)
HTM_I221	chr10	6035180	G	A	0	22	22	100	homozygous
HTM_I221	chr10	12605705	C	T	0	22	22	100	homozygous
HTM_I221	chr10	21932882	G	T	5	14	19	73.6842	heterozygous
HTM_I221	chr11	9975035	AT	A	0	10	10	100	homozygous
HTM_I221	chr11	22293173	G	C	2	16	18	88.8889	homozygous
HTM_I221	chr12	5085929	C	T	0	19	19	100	homozygous
HTM_I223	chr01	979600	C	T	11	9	20	45	heterozygous	synonymous_variant	LOW	OS01G0117300	Similar to Receptor kinase LRK10. (Os01t0117300-00)
HTM_I223	chr01	1672840	TTGTC	T	1	11	12	91.6667	homozygous
HTM_I223	chr01	4805864	C	T	12	11	23	47.8261	heterozygous
HTM_I223	chr01	8800203	TTA	T	0	13	13	100	homozygous
HTM_I223	chr01	15786069	T	A	0	17	17	100	homozygous
HTM_I223	chr01	15786070	G	A	0	17	17	100	homozygous
HTM_I223	chr01	16457442	CGCGAA	C	0	8	8	100	homozygous
HTM_I223	chr01	17539911	CA	C	0	10	10	100	homozygous
HTM_I223	chr01	18431811	T	A	0	16	16	100	homozygous
HTM_I223	chr01	18721008	C	T	0	21	21	100	homozygous	3_prime_UTR_variant	MODIFIER	OS01G0524251	Conserved hypothetical protein. (Os01t0524251-01)
HTM_I223	chr01	20152630	G	A	6	6	12	50	heterozygous
HTM_I223	chr01	37780408	A	G	8	12	20	60	heterozygous	missense_variant	MODERATE	OS01G0871300	Pyridoxal phosphate-dependent transferase%2C major region domain containing protein. (Os01t0871300-01)%3BSimilar to Aspartate aminotransferase. (Os01t0871300-02)
HTM_I223	chr01	37915508	A	G	6	10	16	62.5	heterozygous	3_prime_UTR_variant	MODIFIER	OS01G0874100	Hypothetical conserved gene. (Os01t0874100-01)%3BDeoxynucleoside kinase family protein. (Os01t0874100-02)
HTM_I223	chr01	39504591	A	T	0	12	12	100	homozygous
HTM_I223	chr01	39957913	GAGTT	G	1	16	17	94.1176	homozygous
HTM_I223	chr02	2944867	G	T	4	6	10	60	heterozygous
HTM_I223	chr03	7923750	CTTTTAGTATATAATAGATAGATATTCTTTTTCTATTTTTACGTTT	C	2	15	17	88.2353	homozygous
HTM_I223	chr03	12550522	T	A	0	15	15	100	homozygous	splice_region_variant&intron_variant	LOW	OS03G0337900	Similar to predicted protein. (Os03t0337900-01)
HTM_I223	chr03	13838918	TCGGCGGCAG	T	0	16	16	100	homozygous
HTM_I223	chr03	19054736	T	A	2	21	23	91.3043	homozygous
HTM_I223	chr03	25099309	G	A	1	8	9	88.8889	homozygous
HTM_I223	chr03	29511594	C	A	0	21	21	100	homozygous
HTM_I223	chr03	34158196	C	A	0	7	7	100	homozygous
HTM_I223	chr04	10233651	T	A	6	13	19	68.4211	heterozygous
HTM_I223	chr04	12662949	G	T	1	17	18	94.4444	homozygous
HTM_I223	chr04	17712043	C	T	8	9	17	52.9412	heterozygous
HTM_I223	chr04	20805102	A	G	11	14	25	56	heterozygous
HTM_I223	chr04	30296484	T	C	0	17	17	100	homozygous	intron_variant	MODIFIER	OS04G0600400	Peptidase aspartic%2C catalytic domain containing protein. (Os04t0600400-01)
HTM_I223	chr04	32479793	GTGA	G	0	13	13	100	homozygous
HTM_I223	chr05	826718	A	G	0	19	19	100	homozygous
HTM_I223	chr05	2123299	C	T	0	10	10	100	homozygous
HTM_I223	chr05	2148219	G	C	0	18	18	100	homozygous	intron_variant	MODIFIER	OS05G0136900	Transferase family protein. (Os05t0136900-01)
HTM_I223	chr05	2148224	G	C	0	19	19	100	homozygous	intron_variant	MODIFIER	OS05G0136900	Transferase family protein. (Os05t0136900-01)
HTM_I223	chr05	12192710	A	T	0	13	13	100	homozygous
HTM_I223	chr05	12195400	T	C	15	14	29	48.2759	heterozygous
HTM_I223	chr05	13800760	C	T	9	8	17	47.0588	heterozygous
HTM_I223	chr05	17869329	G	A	9	6	15	40	heterozygous
HTM_I223	chr05	20137186	CGCTGGACGAGTTCCCTCCCGAGACCGA	C	0	6	6	100	homozygous
HTM_I223	chr05	24415757	ATTTGAGGT	A	0	6	6	100	homozygous
HTM_I223	chr06	6339822	G	A	0	14	14	100	homozygous
HTM_I223	chr06	6862192	C	T	1	17	18	94.4444	homozygous
HTM_I223	chr06	17572943	GA	G	5	10	15	66.6667	heterozygous
HTM_I223	chr06	18310288	C	T	11	9	20	45	heterozygous
HTM_I223	chr06	26930384	C	A	1	24	25	96	homozygous	non_coding_exon_variant	MODIFIER	EPlOSAG00000029671
HTM_I223	chr07	1927302	T	C	0	15	15	100	homozygous
HTM_I223	chr07	2099877	T	G	6	4	10	40	heterozygous
HTM_I223	chr07	5390993	AG	A	0	6	6	100	homozygous
HTM_I223	chr07	13015518	C	T	12	14	26	53.8462	heterozygous
HTM_I223	chr07	14277445	G	A	5	11	16	68.75	heterozygous
HTM_I223	chr07	18472297	TG	T	0	9	9	100	homozygous
HTM_I223	chr07	23349822	T	C	0	15	15	100	homozygous	missense_variant	MODERATE	OS07G0577400	Similar to Constitutive photomorphogenesis protein 10. (Os07t0577400-01)
HTM_I223	chr07	26377075	G	T	0	22	22	100	homozygous	missense_variant	MODERATE	OS07G0635300	Similar to Cytochrome P450. (Os07t0635300-01)
HTM_I223	chr07	27410532	G	T	0	22	22	100	homozygous
HTM_I223	chr07	27651995	G	GT	1	17	18	94.4444	homozygous
HTM_I223	chr07	28964932	GATCTGTGCAGATGGCATATGCAATTGCAGAGAAGGATGCAGTGAAGGCTCC	G	0	22	22	100	homozygous	disruptive_inframe_deletion	MODERATE	OS07G0682800	Similar to Apyrase-like protein. (Os07t0682800-01)
HTM_I223	chr07	28978748	G	C	0	17	17	100	homozygous
HTM_I223	chr08	3898562	C	T	4	17	21	80.9524	homozygous
HTM_I223	chr09	3617694	T	A	0	14	14	100	homozygous
HTM_I223	chr09	13421222	CTAG	C	0	17	17	100	homozygous
HTM_I223	chr10	2691478	G	C	0	13	13	100	homozygous
HTM_I223	chr10	4288093	GGACTAAAGAT	G	0	18	18	100	homozygous
HTM_I223	chr10	6121361	C	T	1	12	13	92.3077	homozygous
HTM_I223	chr10	6918158	C	T	0	28	28	100	homozygous
HTM_I223	chr10	8330598	C	T	1	17	18	94.4444	homozygous
HTM_I223	chr10	9465025	T	C	1	17	18	94.4444	homozygous
HTM_I223	chr10	9536180	CAT	C	1	10	11	90.9091	homozygous
HTM_I223	chr10	11364358	A	T	0	24	24	100	homozygous
HTM_I223	chr10	13763640	A	T	5	6	11	54.5455	heterozygous
HTM_I223	chr10	14772554	G	A	0	25	25	100	homozygous
HTM_I223	chr10	22424220	C	A	0	26	26	100	homozygous
HTM_I223	chr10	22598405	TG	T	0	12	12	100	homozygous
HTM_I223	chr11	13744936	C	T	0	15	15	100	homozygous
HTM_I223	chr11	20659117	T	G	0	21	21	100	homozygous
HTM_I223	chr11	22293226	C	T	0	24	24	100	homozygous
HTM_I223	chr12	1851029	C	T	0	21	21	100	homozygous
HTM_I223	chr12	8661626	T	A	0	21	21	100	homozygous
HTM_I223	chr12	14882976	AACGAATCCG	A	0	9	9	100	homozygous
HTM_I223	chr12	16086960	G	C	1	9	10	90	homozygous
HTM_I223	chr12	17662513	GC	G	0	14	14	100	homozygous
HTM_I223	chr12	24814672	TTTCTCAAAAA	T	2	14	16	87.5	homozygous
HTM_I224	chr01	3997523	CTCGTCTTTTCTTGTCATCT	C	1	16	17	94.1176	homozygous
HTM_I224	chr01	29465395	G	A	0	9	9	100	homozygous
HTM_I224	chr01	34236578	C	A	1	17	18	94.4444	homozygous
HTM_I224	chr02	4361920	A	T	8	15	23	65.2174	heterozygous	missense_variant	MODERATE	OS02G0178800	Similar to Glossy1 protein. (Os02t0178800-01)%3BSimilar to Glossy1 homolog (Fragment). (Os02t0178800-02)
HTM_I224	chr02	8709966	C	T	8	9	17	52.9412	heterozygous
HTM_I224	chr02	10867157	G	A	2	5	7	71.4286	heterozygous	synonymous_variant	LOW	OS02G0288100	Similar to Pectinesterase (EC 3.1.1.11) (Fragment). (Os02t0288100-01)
HTM_I224	chr02	12303338	C	T	8	11	19	57.8947	heterozygous
HTM_I224	chr02	12902432	C	T	3	6	9	66.6667	heterozygous
HTM_I224	chr02	15071508	T	G	6	9	15	60	heterozygous
HTM_I224	chr02	22322661	A	G	0	20	20	100	homozygous
HTM_I224	chr02	28612466	C	T	0	15	15	100	homozygous
HTM_I224	chr02	29661977	CT	C	0	11	11	100	homozygous
HTM_I224	chr03	4427644	T	TA	0	16	16	100	homozygous
HTM_I224	chr03	10576503	C	T	0	16	16	100	homozygous	intron_variant	MODIFIER	OS03G0300700	Retrotransposon gag protein family protein. (Os03t0300700-01)
HTM_I224	chr03	22502661	G	A	5	4	9	44.4444	heterozygous
HTM_I224	chr04	14519193	T	G	1	10	11	90.9091	homozygous
HTM_I224	chr04	18901165	G	T	7	5	12	41.6667	heterozygous
HTM_I224	chr05	13985915	T	C	0	11	11	100	homozygous
HTM_I224	chr05	27799721	G	A	0	16	16	100	homozygous
HTM_I224	chr06	1148838	G	C	1	15	16	93.75	homozygous
HTM_I224	chr06	4889508	G	A	0	22	22	100	homozygous	intron_variant	MODIFIER	OS06G0196300	Similar to Peroxiredoxin Q (Fragment). (Os06t0196300-01)%3BSimilar to Peroxiredoxin Q (Fragment). (Os06t0196300-02)
HTM_I224	chr06	5088020	G	A	9	13	22	59.0909	heterozygous	non_coding_exon_variant	MODIFIER	OS06G0200600	Non-protein coding transcript. (Os06t0200600-01)
HTM_I224	chr06	9376280	C	A	0	19	19	100	homozygous
HTM_I224	chr06	15913984	G	GA	0	11	11	100	homozygous
HTM_I224	chr06	24029136	T	TTTC	1	18	19	94.7368	homozygous
HTM_I224	chr07	750715	TGAA	T	0	12	12	100	homozygous	disruptive_inframe_deletion	MODERATE	OS07G0113600	Hypothetical conserved gene. (Os07t0113600-00)
HTM_I224	chr07	1563898	C	T	0	11	11	100	homozygous
HTM_I224	chr07	3903811	T	C	0	19	19	100	homozygous
HTM_I224	chr07	5110304	C	G	0	9	9	100	homozygous
HTM_I224	chr07	5591798	C	A	2	20	22	90.9091	homozygous
HTM_I224	chr07	15348169	G	A	7	8	15	53.3333	heterozygous	intron_variant	MODIFIER	OS07G0447800	Alpha-D-phosphohexomutase%2C alpha/beta/alpha I%2C II and III domain containing protein. (Os07t0447800-01)
HTM_I224	chr07	17938517	G	A	9	9	18	50	heterozygous
HTM_I224	chr07	26738908	TGAAG	T	0	23	23	100	homozygous
HTM_I224	chr08	6341093	G	C	0	13	13	100	homozygous
HTM_I224	chr08	7765986	AAACAACACTTGAGACCATTG	A	0	18	18	100	homozygous
HTM_I224	chr08	28146415	TA	T	1	11	12	91.6667	homozygous	frameshift_variant	HIGH	OS08G0562200	Similar to CUC2. (Os08t0562200-02)%3BHypothetical conserved gene. (Os08t0562200-03)
HTM_I224	chr09	9094685	AAAGTTT	A	0	20	20	100	homozygous
HTM_I224	chr09	15357696	G	T	0	11	11	100	homozygous
HTM_I224	chr09	16753629	GGA	G	1	5	6	83.3333	homozygous
HTM_I224	chr10	3703111	A	T	0	17	17	100	homozygous
HTM_I224	chr10	7670112	G	A	0	7	7	100	homozygous
HTM_I224	chr10	20539162	T	A	0	27	27	100	homozygous	missense_variant	MODERATE	OS10G0527900	Leucine-rich repeat%2C N-terminal domain containing protein. (Os10t0527900-01)
HTM_I224	chr10	21519424	ATATT	A	3	6	9	66.6667	heterozygous
HTM_I224	chr11	9997648	C	T	0	12	12	100	homozygous
HTM_I224	chr11	10026365	G	C	0	16	16	100	homozygous
HTM_I224	chr11	19781923	G	A	1	13	14	92.8571	homozygous
HTM_I224	chr12	7361537	TAGA	T	0	15	15	100	homozygous
HTM_I224	chr12	7361541	A	C	0	16	16	100	homozygous
HTM_I224	chr12	7361542	TAGAA	T	0	16	16	100	homozygous
HTM_I224	chr12	22714342	A	G	0	15	15	100	homozygous
HTM_I224	chr12	22739658	AAT	A	1	19	20	95	homozygous
HTM_I226	chr01	2027970	C	T	2	10	12	83.3333	homozygous
HTM_I226	chr01	6982402	G	A	0	17	17	100	homozygous	missense_variant	MODERATE	OS01G0226500	Conserved hypothetical protein. (Os01t0226500-01)%3BSimilar to predicted protein. (Os01t0226500-02)
HTM_I226	chr01	9347661	A	G	2	15	17	88.2353	homozygous
HTM_I226	chr01	10604627	ATG	A	0	18	18	100	homozygous
HTM_I226	chr01	15301766	C	T	5	9	14	64.2857	heterozygous
HTM_I226	chr01	16843036	T	A	3	5	8	62.5	heterozygous
HTM_I226	chr01	18257881	G	A	11	19	30	63.3333	heterozygous
HTM_I226	chr01	19543666	TC	T	0	25	25	100	homozygous
HTM_I226	chr01	27981728	A	G	0	12	12	100	homozygous
HTM_I226	chr01	33967793	C	T	0	19	19	100	homozygous
HTM_I226	chr01	34491080	ACGGCTGC	A	0	15	15	100	homozygous
HTM_I226	chr01	35294314	G	C	1	10	11	90.9091	homozygous
HTM_I226	chr02	4366613	CATAT	C	0	12	12	100	homozygous
HTM_I226	chr02	4366620	G	C	0	12	12	100	homozygous
HTM_I226	chr02	9244220	A	ATATC	1	7	8	87.5	homozygous
HTM_I226	chr02	13751099	C	T	8	6	14	42.8571	heterozygous
HTM_I226	chr02	14909137	C	A	0	8	8	100	homozygous
HTM_I226	chr02	18714440	GAAACTGCGAGACAA	G	0	6	6	100	homozygous
HTM_I226	chr02	23230028	ACAAAATTGCAAAACT	A	0	25	25	100	homozygous	intron_variant	MODIFIER	OS02G0597700	Ubiquitin domain containing protein. (Os02t0597700-00)
HTM_I226	chr02	26483130	C	A	0	13	13	100	homozygous
HTM_I226	chr02	29842016	TGTCGTCGTC	T	5	8	13	61.5385	heterozygous
HTM_I226	chr03	8273551	TGGTAAATGTGTGGACCAAAA	T	1	14	15	93.3333	homozygous
HTM_I226	chr04	2004257	C	T	7	7	14	50	heterozygous
HTM_I226	chr04	3457171	G	A	4	7	11	63.6364	heterozygous
HTM_I226	chr04	3528976	T	A	7	7	14	50	heterozygous
HTM_I226	chr04	10010379	G	A	0	14	14	100	homozygous
HTM_I226	chr04	17543879	AAATG	A	1	27	28	96.4286	homozygous
HTM_I226	chr04	17683532	T	C	1	12	13	92.3077	homozygous
HTM_I226	chr04	20513039	G	GT	0	9	9	100	homozygous
HTM_I226	chr04	26725528	A	AT	0	9	9	100	homozygous
HTM_I226	chr05	5825546	TCGTC	T	0	11	11	100	homozygous
HTM_I226	chr05	22515317	GA	G	9	8	17	47.0588	heterozygous
HTM_I226	chr05	23836594	A	T	10	12	22	54.5455	heterozygous
HTM_I226	chr05	24014319	GCAATACTAT	G	0	20	20	100	homozygous	3_prime_UTR_variant	MODIFIER	OS05G0488500	Ribosomal protein L34e family protein. (Os05t0488500-01)
HTM_I226	chr05	24126885	A	AT	5	5	10	50	heterozygous
HTM_I226	chr06	458033	AT	A	5	8	13	61.5385	heterozygous
HTM_I226	chr06	5234193	A	ATAGTAGTAG	1	12	13	92.3077	homozygous
HTM_I226	chr06	6031686	A	T	0	15	15	100	homozygous
HTM_I226	chr06	13129608	AC	A	0	12	12	100	homozygous
HTM_I226	chr06	22043817	T	G	0	13	13	100	homozygous
HTM_I226	chr06	26419279	A	AT	0	13	13	100	homozygous
HTM_I226	chr06	28560475	TA	T	1	12	13	92.3077	homozygous
HTM_I226	chr07	3855324	G	T	0	21	21	100	homozygous
HTM_I226	chr07	6596299	CATTG	C	1	20	21	95.2381	homozygous
HTM_I226	chr07	13394976	T	TC	1	16	17	94.1176	homozygous
HTM_I226	chr07	17960527	G	A	2	8	10	80	homozygous
HTM_I226	chr07	28487696	C	T	0	21	21	100	homozygous
HTM_I226	chr08	428031	T	A	7	5	12	41.6667	heterozygous
HTM_I226	chr08	4024748	G	T	2	15	17	88.2353	homozygous
HTM_I226	chr08	14609069	C	T	1	24	25	96	homozygous	missense_variant	MODERATE	OS08G0331100	Chloramphenicol acetyltransferase-like domain domain containing protein. (Os08t0331100-00)
HTM_I226	chr09	272095	C	CAG	1	17	18	94.4444	homozygous
HTM_I226	chr09	2568838	C	A	0	26	26	100	homozygous
HTM_I226	chr09	2907280	C	T	0	20	20	100	homozygous
HTM_I226	chr09	4268645	C	T	0	18	18	100	homozygous
HTM_I226	chr10	4378588	C	T	1	18	19	94.7368	homozygous
HTM_I226	chr10	4531740	G	A	16	12	28	42.8571	heterozygous
HTM_I226	chr11	455967	A	G	0	16	16	100	homozygous	missense_variant	MODERATE	OS11G0109800	Pentatricopeptide repeat domain containing protein. (Os11t0109800-00)
HTM_I226	chr11	8470815	T	TG	3	4	7	57.1429	heterozygous
HTM_I226	chr11	16941981	C	A	6	8	14	57.1429	heterozygous
HTM_I226	chr11	18155612	AG	A	0	19	19	100	homozygous
HTM_I226	chr11	25086969	A	C	1	19	20	95	homozygous
HTM_I226	chr12	8331631	T	A	0	18	18	100	homozygous
HTM_I226	chr12	9311641	C	A	1	12	13	92.3077	homozygous
HTM_I226	chr12	11841100	T	C	8	7	15	46.6667	heterozygous
HTM_I226	chr12	16340259	T	C	0	18	18	100	homozygous
HTM_I226	chr12	18774808	GAGCCGACTGCCGAAAACC	G	3	6	9	66.6667	heterozygous
HTM_I226	chr12	25919822	G	A	3	9	12	75	homozygous
HTM_I227	chr01	3184984	TGAACAACTCGTTTCTAGGGAATGATG	T	0	12	12	100	homozygous	frameshift_variant	HIGH	OS01G0160700	Leucine-rich repeat%2C N-terminal domain containing protein. (Os01t0160700-00)
HTM_I227	chr01	10287560	G	A	0	13	13	100	homozygous
HTM_I227	chr01	18526088	G	C	0	13	13	100	homozygous
HTM_I227	chr01	20644574	TCAG	T	0	21	21	100	homozygous
HTM_I227	chr01	24572283	G	T	0	21	21	100	homozygous
HTM_I227	chr01	26448507	T	C	0	15	15	100	homozygous
HTM_I227	chr01	27670564	T	A	0	21	21	100	homozygous	intron_variant	MODIFIER	OS01G0673600	Similar to Ubiquitin-conjugating enzyme E2. (Os01t0673600-01)
HTM_I227	chr01	30767731	T	C	0	15	15	100	homozygous
HTM_I227	chr01	31823075	C	T	10	12	22	54.5455	heterozygous
HTM_I227	chr02	4522786	ATCTCGATCGCTGGGC	A	0	19	19	100	homozygous	5_prime_UTR_variant	MODIFIER	OS02G0180900	Hypothetical protein. (Os02t0180900-01)
HTM_I227	chr02	8134722	C	T	0	9	9	100	homozygous
HTM_I227	chr02	13616384	G	T	7	6	13	46.1538	heterozygous
HTM_I227	chr02	18984952	ACACAAT	A	0	10	10	100	homozygous
HTM_I227	chr02	22732455	TAA	T	1	6	7	85.7143	homozygous	intron_variant	MODIFIER	OS02G0589000	Lecithin:cholesterol acyltransferase family protein. (Os02t0589000-01)
HTM_I227	chr02	30167870	T	TTA	0	8	8	100	homozygous
HTM_I227	chr03	14290016	G	T	0	20	20	100	homozygous	splice_region_variant&intron_variant	LOW	OS03G0365800	Lipase%2C GDSL domain containing protein. (Os03t0365800-01)
HTM_I227	chr03	16219709	G	A	1	17	18	94.4444	homozygous	missense_variant	MODERATE	OS03G0400000	Conserved hypothetical protein. (Os03t0400000-00)
HTM_I227	chr03	23124733	G	T	2	21	23	91.3043	homozygous	synonymous_variant	LOW	OS03G0612201	Hypothetical conserved gene. (Os03t0612201-00)
HTM_I227	chr04	4608421	G	T	0	22	22	100	homozygous
HTM_I227	chr04	5353201	C	A	7	5	12	41.6667	heterozygous
HTM_I227	chr04	5862892	G	C	0	14	14	100	homozygous
HTM_I227	chr04	9304695	G	T	0	25	25	100	homozygous
HTM_I227	chr04	9372405	G	C	0	10	10	100	homozygous
HTM_I227	chr04	20795667	T	TA	0	19	19	100	homozygous
HTM_I227	chr04	23599476	C	T	0	23	23	100	homozygous
HTM_I227	chr05	5538511	C	A	0	19	19	100	homozygous
HTM_I227	chr05	9808784	C	T	1	12	13	92.3077	homozygous
HTM_I227	chr05	13807150	G	A	0	12	12	100	homozygous
HTM_I227	chr05	19754157	A	AC	1	12	13	92.3077	homozygous
HTM_I227	chr05	22227876	C	T	0	14	14	100	homozygous
HTM_I227	chr05	29930091	G	A	9	14	23	60.8696	heterozygous
HTM_I227	chr06	16607080	C	CA	6	5	11	45.4545	heterozygous
HTM_I227	chr06	19978876	GAATGGTCA	G	0	17	17	100	homozygous
HTM_I227	chr06	27260108	G	T	1	24	25	96	homozygous	intron_variant	MODIFIER	OS06G0661400	Similar to clathrin assembly protein. (Os06t0661400-01)
HTM_I227	chr06	27260109	T	A	1	24	25	96	homozygous	intron_variant	MODIFIER	OS06G0661400	Similar to clathrin assembly protein. (Os06t0661400-01)
HTM_I227	chr06	28998540	T	G	0	10	10	100	homozygous
HTM_I227	chr07	8767257	GA	G	1	16	17	94.1176	homozygous
HTM_I227	chr07	9055246	C	T	0	14	14	100	homozygous
HTM_I227	chr07	18939559	C	T	0	8	8	100	homozygous
HTM_I227	chr07	20623012	G	A	0	7	7	100	homozygous
HTM_I227	chr07	21390590	A	AT	0	13	13	100	homozygous
HTM_I227	chr07	24983638	G	A	0	22	22	100	homozygous
HTM_I227	chr08	7375298	C	A	0	16	16	100	homozygous
HTM_I227	chr08	12053086	A	G	0	18	18	100	homozygous
HTM_I227	chr08	18521263	TGAACGCA	T	1	27	28	96.4286	homozygous
HTM_I227	chr08	18571754	TA	T	1	16	17	94.1176	homozygous
HTM_I227	chr08	20183695	C	G	0	16	16	100	homozygous
HTM_I227	chr08	24108794	G	A	5	11	16	68.75	heterozygous
HTM_I227	chr08	26865356	G	A	0	13	13	100	homozygous
HTM_I227	chr09	5542548	G	T	0	17	17	100	homozygous
HTM_I227	chr09	7020335	C	T	1	13	14	92.8571	homozygous	intron_variant	MODIFIER	OS09G0294300	Ubiquitin-conjugating enzyme/RWD-like domain containing protein. (Os09t0294300-01)
HTM_I227	chr10	602786	G	A	3	21	24	87.5	homozygous
HTM_I227	chr10	4964662	C	T	1	6	7	85.7143	homozygous
HTM_I227	chr10	8206590	C	T	0	10	10	100	homozygous
HTM_I227	chr11	1432871	C	CT	9	6	15	40	heterozygous
HTM_I227	chr11	7619467	CCCTCTATTTGT	C	0	9	9	100	homozygous
HTM_I227	chr11	17952117	G	T	1	15	16	93.75	homozygous
HTM_I227	chr12	8071410	C	G	0	11	11	100	homozygous
HTM_I227	chr12	11467211	A	T	0	13	13	100	homozygous
HTM_I227	chr12	12573930	G	C	0	13	13	100	homozygous	missense_variant	MODERATE	OS12G0411700	ABC transporter-like domain containing protein. (Os12t0411700-01)%3BSimilar to white-brown-complex ABC transporter family. (Os12t0411700-02)
HTM_I227	chr12	15061568	G	A	0	22	22	100	homozygous
HTM_I227	chr12	16931854	C	T	0	17	17	100	homozygous
HTM_I227	chr12	17246204	C	T	0	15	15	100	homozygous
HTM-I257	chr01	11546960	C	T	10	8	18	44.4444	heterozygous
HTM-I257	chr01	18738313	G	T	4	8	12	66.6667	heterozygous
HTM-I257	chr01	19077882	G	A	6	6	12	50	heterozygous
HTM-I257	chr01	23495919	G	A	0	9	9	100	homozygous
HTM-I257	chr02	2530736	A	C	0	17	17	100	homozygous
HTM-I257	chr02	16063025	G	A	3	4	7	57.1429	heterozygous
HTM-I257	chr02	22966964	AC	A	0	11	11	100	homozygous
HTM-I257	chr03	15589387	G	A	2	5	7	71.4286	heterozygous
HTM-I257	chr04	2515226	G	A	0	24	24	100	homozygous
HTM-I257	chr04	7955038	C	G	0	18	18	100	homozygous
HTM-I257	chr04	12948748	T	C	1	19	20	95	homozygous
HTM-I257	chr04	21927602	GCCGAA	G	0	11	11	100	homozygous
HTM-I257	chr04	21977762	T	A	0	7	7	100	homozygous
HTM-I257	chr04	23157163	GA	G	0	26	26	100	homozygous	frameshift_variant	HIGH	OS04G0463800	Pentatricopeptide repeat domain containing protein. (Os04t0463800-01)
HTM-I257	chr04	23157167	G	C	0	26	26	100	homozygous	stop_gained	HIGH	OS04G0463800	Pentatricopeptide repeat domain containing protein. (Os04t0463800-01)
HTM-I257	chr04	23157170	TAG	T	0	26	26	100	homozygous	frameshift_variant	HIGH	OS04G0463800	Pentatricopeptide repeat domain containing protein. (Os04t0463800-01)
HTM-I257	chr04	23262817	C	CT	2	13	15	86.6667	homozygous
HTM-I257	chr04	25273014	G	A	0	20	20	100	homozygous
HTM-I257	chr04	26509667	G	GT	7	5	12	41.6667	heterozygous
HTM-I257	chr04	34395595	G	A	0	15	15	100	homozygous	intron_variant	MODIFIER	OS04G0673700	Hypothetical protein. (Os04t0673700-01)%3BHypothetical protein. (Os04t0673700-02)
HTM-I257	chr05	7073968	C	T	1	13	14	92.8571	homozygous
HTM-I257	chr05	13663797	ATGTCT	A	0	23	23	100	homozygous
HTM-I257	chr05	19142473	G	A	2	16	18	88.8889	homozygous
HTM-I257	chr06	2361429	A	C	0	12	12	100	homozygous	intron_variant	MODIFIER	OS06G0144600	Similar to Zinc carboxy peptidase. (Os06t0144600-01)
HTM-I257	chr06	9869218	G	GC	0	20	20	100	homozygous
HTM-I257	chr06	10299539	CTTTTCTTTCAACTCTTCCAACTGTTTCTTAACTTCGGCCAGTTCA	C	0	5	5	100	homozygous
HTM-I257	chr06	11349113	G	T	1	26	27	96.2963	homozygous
HTM-I257	chr06	12998193	G	A	2	23	25	92	homozygous	intron_variant	MODIFIER	OS06G0329200	Conserved hypothetical protein. (Os06t0329200-01)%3BHypothetical gene. (Os06t0329200-02)
HTM-I257	chr06	21291673	T	C	0	9	9	100	homozygous
HTM-I257	chr06	21834480	C	G	11	9	20	45	heterozygous
HTM-I257	chr06	24768516	C	A	1	14	15	93.3333	homozygous
HTM-I257	chr07	7255255	TA	T	0	11	11	100	homozygous
HTM-I257	chr07	8203479	GT	G	0	22	22	100	homozygous
HTM-I257	chr07	18012074	G	C	17	18	35	51.4286	heterozygous
HTM-I257	chr07	18738215	T	A	0	21	21	100	homozygous
HTM-I257	chr07	22619155	AGTT	A	0	7	7	100	homozygous	5_prime_UTR_variant	MODIFIER	OS07G0564500	Pyridine nucleotide-disulphide oxidoreductase%2C NAD-binding region domain containing protein. (Os07t0564500-01)
HTM-I257	chr08	4024470	C	T	0	13	13	100	homozygous
HTM-I257	chr08	11448775	G	A	0	13	13	100	homozygous	missense_variant	MODERATE	OS08G0288200	Adenylate kinase family protein. (Os08t0288200-01)
HTM-I257	chr08	18578749	C	T	3	7	10	70	heterozygous
HTM-I257	chr08	25754518	C	T	7	6	13	46.1538	heterozygous
HTM-I257	chr08	26330780	A	T	6	15	21	71.4286	heterozygous
HTM-I257	chr09	549299	G	A	0	9	9	100	homozygous
HTM-I257	chr09	12107038	T	C	0	17	17	100	homozygous
HTM-I257	chr09	12107039	A	G	0	17	17	100	homozygous
HTM-I257	chr10	2947890	GT	G	8	13	21	61.9048	heterozygous
HTM-I257	chr11	7367222	A	G	0	24	24	100	homozygous	synonymous_variant	LOW	OS11G0238000	Similar to NB-ARC domain containing protein. (Os11t0238000-00)
HTM-I257	chr11	12558672	G	A	0	12	12	100	homozygous
HTM-I257	chr11	22941831	TCAAA	T	0	6	6	100	homozygous
HTM-I257	chr11	25009293	G	GT	0	19	19	100	homozygous
HTM-I257	chr12	13739664	C	A	0	20	20	100	homozygous
HTM-I257	chr12	15286509	C	G	0	20	20	100	homozygous
HTM-I257	chr12	24728725	CCT	C	1	10	11	90.9091	homozygous
